# Supplementary material for: Deformylation reaction-based probe for in vivo imaging of HOCl
Source: PubMed Central journal article supplement (PMC5868080; doi:10.1039/c7sc03784h), 2017-11-03
Supplement: SC-009-C7SC03784H-s004.pdf [file SC-009-C7SC03784H-s004.pdf]

Electronic Supplementary Information for

## Deformylation Reaction-Based Probe for *in vivo* Imaging of HOCl

Peng Wei,<sup>†</sup> Wei Yuan,<sup>†</sup> Fengfeng Xue,<sup>†</sup> Wei Zhou,<sup>†</sup> Ruohan Li,<sup>†</sup> Datong Zhang,<sup>‡</sup> and Tao Yi<sup>\*,†</sup>

<sup>†</sup>Department of Chemistry and Collaborative Innovation Center of Chemistry for Energy Materials, Fudan University, 220 Handan Road, Shanghai 200433, China

<sup>‡</sup>Shandong Provincial Key Laboratory of Fine Chemicals, School of Chemistry and Pharmaceutical Engineering, Qilu University of Technology, Jinan 250353, Shandong, China

### Content

|                                           |    |
|-------------------------------------------|----|
| 1 Experiment Section .....                | 2  |
| 1.3 The synthesis of <b>FDOCI-1</b> ..... | 2  |
| 1.4 The synthesis of <b>FDOCI-2</b> ..... | 3  |
| 1.5 The synthesis of <b>FDOCI-3</b> ..... | 4  |
| 1.6 The synthesis of <b>FDOCI-4</b> ..... | 5  |
| 2 Additional tables .....                 | 7  |
| 3 Additional images and figures .....     | 15 |
| 4 NMR and HRMS spectra .....              | 28 |
| 5 References .....                        | 35 |

## 1 Experiment Section

### 1.1 The synthesis of FDOCI-1

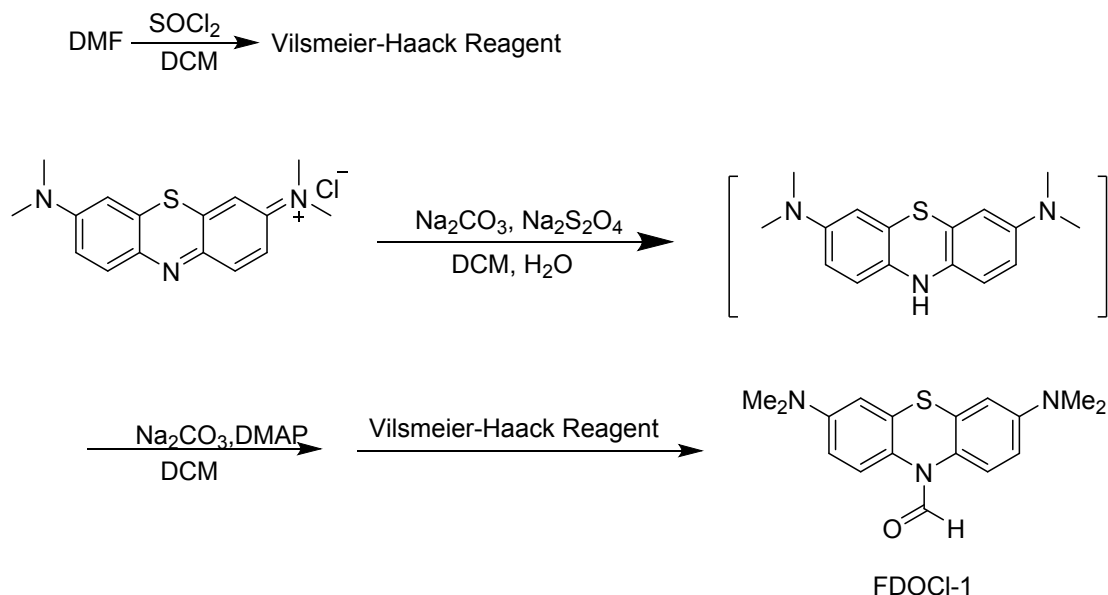

**Scheme S1.** The synthesis route of **FDOCI-1**.

To a stirred solution of dried DMF (0.5 mL) in 10 mL dichloromethane, thionyl chloride (1.78 g, 15 mmol, 4.0 eq) dissolved in 5 mL dichloromethane was added dropwise at room temperature. After addition the mixture was stirred at 60°C under nitrogen atmosphere for 15 minutes and evaporated on a rotary evaporator to afford the Vilsmeier-Haack Reagent.

To a solution of methylene blue (1.12 g, 3.75 mmol, 1.0 eq) in 5 mL of water, dichloromethane (10 mL) and Na<sub>2</sub>CO<sub>3</sub> (1.59 g, 15.00 mmol, 4.0 eq) were added and the mixture was stirred at 40°C under nitrogen atmosphere. Sodium dithionite (2.61 g, 15.00 mmol, 4.0 eq) was dissolved in 5 mL water and injected to the solution directly using a syringe device. After addition the mixture was stirred at 40°C under nitrogen atmosphere until the solution became yellow (typically within 15-30 min). The dichloromethane layer was separated from water layer and dried with anhydrous sodium sulfate quickly. After sodium sulfate was removed by filtration, the solution was added dropwise to a mixture of Vilsmeier-Haack Reagent, DMAP (0.46 g, 3.75

mmol, 1.0 eq), Na<sub>2</sub>CO<sub>3</sub> (1.19 g, 11.25 mmol, 3.0 eq) in 5 mL dichloromethane. After addition the mixture was stirred in an ice-water bath for 1 h and then at room temperature until the reaction completed as indicated by TLC analysis.

Removing the undissolved substance by filtration, the solution was poured into 200 mL of ice-water while stirring, and the resulting mixture was extracted with 3 × 100 mL portions of ethyl acetate. The combined extracts were washed with brine, dried over anhydrous sodium sulfate and evaporated on a rotary evaporator to afford a solid residue, which was purified by column chromatography (ethyl acetate/n-hexane = 1/5) to yield **FDOCI-1** as a white solid. Yield 0.53 g, 45%. M. p. 192.8 ~ 193.8°C; <sup>1</sup>H NMR (400 MHz, DMSO-d<sub>6</sub>) δ 8.52 (s, 1H), 7.42 (d, *J* = 8.4 Hz, 1H), 7.29 (d, *J* = 8.8 Hz, 1H), 6.75 (d, *J* = 2.8 Hz, 1H), 6.76 - 6.66 (m, 3H), 2.90 (s, 12H). <sup>13</sup>C NMR (100 MHz, DMSO-d<sub>6</sub>) δ 160.97, 149.11, 148.84, 130.23, 129.47, 126.64, 125.66, 124.53, 122.70, 111.21, 110.54, 110.11, 109.64, 40.19. HRMS (ESI): [M + H]<sup>+</sup> calcd for C<sub>17</sub>H<sub>20</sub>N<sub>3</sub>OS: 314.1322; found: 314.1319.

## 1.2 The synthesis of FDOCI-2

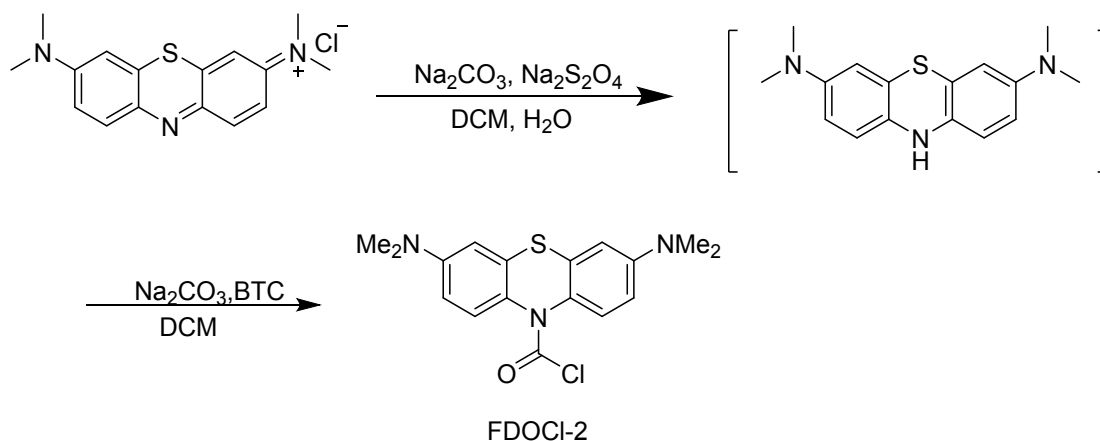

**Scheme S2.** The synthesis route of **FDOCI-2**.

To a solution of methylene blue (5.00 g, 15.63 mmol, 1.0 eq) in 50 mL of water, dichloromethane (25 mL) and Na<sub>2</sub>CO<sub>3</sub> (6.63 g, 62.52 mmol, 4.0 eq) were added and the mixture was stirred at 40°C under nitrogen atmosphere. Sodium dithionite (10.89 g, 62.52 mmol, 4 eq) dissolved in 70 mL water was injected to the solution directly

using a syringe device. After addition the mixture was stirred at 40°C under nitrogen atmosphere until the solution became yellow (typically within 15-30 min). The mixture was cooled with an ice-water bath, to which bis(trichloromethyl)carbonate (2.78 g, 9.38 mmol, 0.6 eq) in 20 mL of dichloromethane was added dropwise. After addition the mixture was stirred for another 1 h. The solution was poured into 200 mL of ice-water while stirring, and the resulting mixture was extracted with 3 × 100 mL portions of dichloromethane. The combined extracts were washed with brine, dried over anhydrous sodium sulfate and evaporated on a rotary evaporator then purified by column chromatography (ethyl acetate/n-hexane = 1/10) to yield **FDOCI-2** as a white solid. Yield 2.83 g, 52%. <sup>1</sup>H NMR (400 MHz, DMSO-d<sub>6</sub>) δ 7.42 (d, *J* = 9.2 Hz, 2H), 6.78 (d, *J* = 2.8 Hz, 2H), 6.70 (dd, *J* = 8.8, 2.8 Hz, 2H), 2.92 (s, 12H). <sup>13</sup>C NMR (100 MHz, CDCl<sub>3</sub>) δ 149.97, 149.45, 134.09, 128.06, 110.85, 110.36, 77.37, 40.66. HRMS (ESI): [M + H]<sup>+</sup> calcd for C<sub>17</sub>H<sub>19</sub>ClN<sub>3</sub>OS: 348.0932; found: 348.0927.

### 1.3 The synthesis of **FDOCI-3**

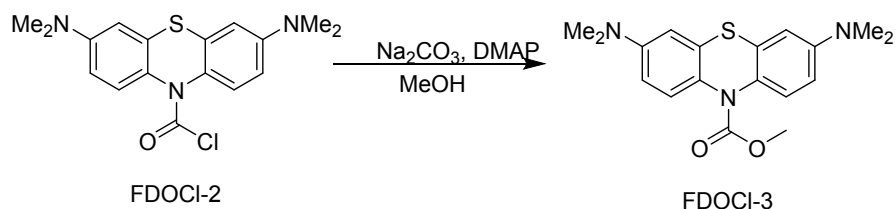

**Scheme S3.** The synthesis route of **FDOCI-3**.

**FDOCI-2** (1.0 g, 2.87 mmol, 1.0 eq), Na<sub>2</sub>CO<sub>3</sub> (0.91 g, 8.61 mmol, 3.0 eq), DMAP (0.35 g, 2.87 mmol, 1.0 eq) were dissolved in 10 mL of methanol and the resulting mixture was stirred in an ice-water bath until the reaction completed as indicated by TLC analysis which was conducted at 1 h intervals.

The reaction mixture was poured into 200 mL of ice-water while stirring, and was extracted with 3 × 100 mL portions of ethyl acetate. The combined extracts were washed with brine, dried over anhydrous sodium sulfate and evaporated on a rotary

evaporator to afford a solid residue, which was purified by column chromatography (ethyl acetate/petroleum ether = 1/5) to yield **FDOCI-3** as a white solid. Yield 0.59 g, 60%. M. p. 155.3 ~ 156.0°C. <sup>1</sup>H NMR (400 MHz, DMSO-d<sub>6</sub>) δ 7.30 (d, *J* = 8.4 Hz, 2H), 6.68 – 6.65 (m, 4H), 3.65 (s, 3H), 2.89 (s, 12H). <sup>13</sup>C NMR (100 MHz, DMSO-d<sub>6</sub>) δ 154.19, 148.60, 131.96, 127.61, 127.00, 110.94, 109.69, 53.03, 40.21. HRMS (ESI): [M + H]<sup>+</sup> calcd for C<sub>18</sub>H<sub>22</sub>N<sub>3</sub>O<sub>2</sub>S: 344.1427; found: 344.1434.

#### 1.4 The synthesis of **FDOCI-4**

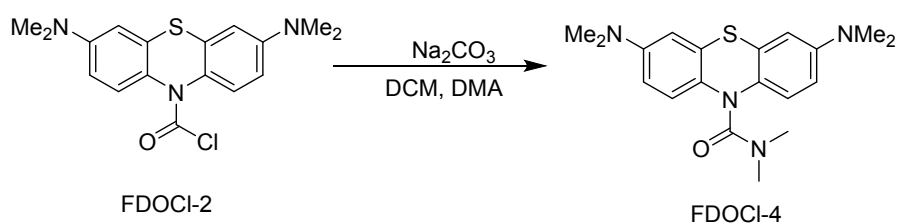

**Scheme S4.** The synthesis route of **FDOCI-4**.

**FDOCI-2** (1.0 g, 2.87 mmol, 1.0 eq), Na<sub>2</sub>CO<sub>3</sub> (0.91 g, 8.61 mmol, 3.0 eq) were dissolved in 10 mL of dichloromethane, the resulting mixture was stirred in an ice-water bath. Dimethylamine (0.52 g, 11.48 mmol, 4.0 eq) in 5 mL of dichloromethane was added dropwise. After addition, the mixture was stirred at room temperature until the reaction completed as indicated by TLC analysis which was conducted at 1 h intervals.

The reaction mixture was poured into 200 mL of ice-water while stirring, and the resulting mixture was extracted with 3 × 150 mL portions of ethyl acetate. The combined extracts were washed with brine, dried over anhydrous sodium sulfate and evaporated on a rotary evaporator to afford an oily residue, which was purified by column chromatography (ethyl acetate/petroleum ether = 1/5) to yield **FDOCI-4** as a white solid. Yield 0.36 g, 35%. M. p. 154.7 ~ 155.3°C. <sup>1</sup>H NMR (400 MHz, DMSO-d<sub>6</sub>) δ 7.42 (d, *J* = 8.8 Hz, 2H), 6.68 (d, *J* = 2.8 Hz, 2H), 6.63 (dd, *J* = 8.8, 2.8 Hz, 2H), 2.86 (s, 12H), 2.64 (s, 6H). <sup>13</sup>C NMR (101 MHz, DMSO-d<sub>6</sub>) δ 157.98, 147.78, 131.11, 129.81, 122.85, 111.40, 110.44, 40.30, 37.49. HRMS (ESI): [M + H]<sup>+</sup> calcd for

$C_{19}H_{25}N_4OS$ : 357.1744; found: 357.1757.

## 2 Additional tables

**Table S1** Some recently published fluorescet probes based on different detection mechanism for HOCl imaging<sup>a</sup>

| Detection mechanisms                      | Probes                                 | Absorbance change                                    | Detection limit/nM <sup>b</sup> | Sensitivity <sup>c</sup>              | Selectivity <sup>d</sup>                                                                  | In vivo application                                                                    |
|-------------------------------------------|----------------------------------------|------------------------------------------------------|---------------------------------|---------------------------------------|-------------------------------------------------------------------------------------------|----------------------------------------------------------------------------------------|
| Oxidation of substituted phenol analogues | HKOCl-1 <sup>1</sup>                   | --                                                   | --                              | 1079-fold (1.0 equiv)                 | 19-fold (10 $\mu$ M HOCl / 10 $\mu$ M ONOO <sup>-</sup> )                                 | --                                                                                     |
|                                           | HKOCl-2b <sup>2</sup>                  | 2-fold decrease (10 $\mu$ M probe / 20 $\mu$ M HOCl) | 18                              | 908-fold (2.0 equiv)                  | >20-fold (10 $\mu$ M HOCl / 100 $\mu$ M ONOO <sup>-</sup> )                               | --                                                                                     |
|                                           | HKOCl-3 <sup>3</sup>                   | Red shift <50nm                                      | 0.33                            | 358-fold (1.0 equiv)                  | 83-fold (100 $\mu$ M HOCl / 100 $\mu$ M ONOO <sup>-</sup> )                               | Fluorescent imaging of HOCl in live zebrafish embryos                                  |
|                                           | FCN2 <sup>4</sup>                      | --                                                   | 6.68                            | 1643.4-fold (3.3 equiv)               | 36-fold over ONOO <sup>-</sup> (5 $\mu$ M HOCl / 50 $\mu$ M ONOO <sup>-</sup> )           | Fluorescent imaging of accumulated HOCl in specific organelles using a zebrafish model |
| Deoxygenation of luminescent oximes       | Phenanthroimidazole-oxime <sup>5</sup> | Red shift > 20nm                                     | --                              | 9.8-fold (ratio, I509/I439, 30 equiv) | >5-fold (ratio, I509/I439, 300 $\mu$ M HOCl / 300 $\mu$ M H <sub>2</sub> O <sub>2</sub> ) | --                                                                                     |
|                                           | Flu-1 <sup>6</sup>                     | --                                                   | --                              | 61-fold (20 equiv)                    | >20-fold (20 $\mu$ M HOCl / 40 $\mu$ M H <sub>2</sub> O <sub>2</sub> )                    | --                                                                                     |
|                                           | BOD-OXINE <sup>7</sup>                 | --                                                   | 17.7                            | 9-fold (50 equiv)                     | >5-fold (100 $\mu$ M HOCl / 100 $\mu$ M H <sub>2</sub> O <sub>2</sub> )                   | --                                                                                     |

|                                                                   |                                 |                                                  |      |                                        |                                                       |                                                                                 |
|-------------------------------------------------------------------|---------------------------------|--------------------------------------------------|------|----------------------------------------|-------------------------------------------------------|---------------------------------------------------------------------------------|
|                                                                   |                                 |                                                  |      |                                        | ONOO <sup>-</sup> )                                   |                                                                                 |
|                                                                   | HCH <sup>8</sup>                | Blue shift 6 nm                                  | 58   | 14.1-fold (25 equiv)                   | >10-fold (250 μM HOCl / 250 μM •OH)                   | --                                                                              |
| Chlorination of thioesters or amides                              | Cou-Rho-HOCl <sup>9</sup>       | > 200-fold increase (5 μM probe / 30 equiv HOCl) | 52   | > 50-fold (ratio, 1594/1473, 30 equiv) | >10-fold (ratio, 1594/1473, 5 μM HOCl / 5 equiv •OH ) | --                                                                              |
|                                                                   | Ru-Fc <sup>10</sup>             | --                                               | 38.6 | 60-fold (6.0 equiv)                    | >20-fold (60 μM HOCl / 60 μM •OH)                     | Fluorescent imaging of HOCl in daphnia magna and zebrafish                      |
|                                                                   | R19-S <sup>11, 12</sup>         | --                                               | --   | > 50-fold (1.0 equiv)                  | >20-fold (10 μM HOCl / 200 μM •OH)                    | Fluorescent imaging of intestinal HOCl production in the drosophila system      |
|                                                                   | FBS <sup>13</sup>               | >5-fold increase (2 μM probe / 20 μM HOCl)       | 200  | > 50-fold (9.5 equiv)                  | >20-fold (19 μM HOCl / 22 μM ONOO <sup>-</sup> )      | Fluorescent imaging of intestinal HOCl production in the drosophila system      |
| Oxidation of thioethers to sulfonates or selenides to selenoxides | HySO <sub>x</sub> <sup>14</sup> | >10-fold increase (5 μM probe / 5 μM HOCl)       | --   | > 50-fold (2.5 equiv)                  | 10-fold over •OH (5 μM HOCl / 100 μM)                 | --                                                                              |
|                                                                   | MMSiR <sup>15</sup>             | >10-fold increase (5 μM probe / 5 μM HOCl)       | --   | > 50-fold (1.0 equiv)                  | >20-fold (5 μM HOCl / 5 μM ONOO <sup>-</sup> )        | Fluorescent imaging of HOCl generation in a PMA induced mouse peritonitis model |
|                                                                   | MITO-TP <sup>16</sup>           | --                                               | 17.2 | 634-fold (20.0 equiv)                  | >50-fold (100 μM HOCl / 100 μM                        | Fluorescent imaging                                                             |



|  |                       |                                             |      |                        |                                                                     |                                                                              |
|--|-----------------------|---------------------------------------------|------|------------------------|---------------------------------------------------------------------|------------------------------------------------------------------------------|
|  |                       |                                             |      |                        | ONOO <sup>-</sup> )                                                 | of LPS-dependent HOCl generation in inflammation tissues                     |
|  | LYSO-TP <sup>16</sup> | --                                          | 19.6 | 610-fold (20.0 equiv)  | >50-fold (100 μM HOCl / 100 μM ONOO <sup>-</sup> )                  | Fluorescent imaging of LPS-dependent HOCl generation in inflammation tissues |
|  | CM1 <sup>17</sup>     | >5-fold increase (4 μM probe / 100 μM HOCl) | 10   | > 50-fold (7.0 equiv)  | >20-fold (100 μM HOCl / 200 μM ONOO <sup>-</sup> )                  | --                                                                           |
|  | PIS <sup>18</sup>     | Blue shift 42 nm                            | 71   | > 5-fold (5.0 equiv)   | >5-fold (10 μM HOCl / 200 μM ·OH)                                   | Fluorescent imaging of HOCl using fresh rat hippocampal slice                |
|  | SeCy7 <sup>19</sup>   | --                                          | 310  | 19.4-fold (2.0 equiv)  | 4.8-fold over <sup>1</sup> O <sub>2</sub> (30 μM HOCl / 600 μM ·OH) | Fluorescent imaging of LPS and PMA induced HOCl production in living mice    |
|  | NI-Se <sup>20</sup>   | --                                          | 586  | > 10-fold (10.0 equiv) | > 10-fold (100 μM HOCl / 200 μM ONOO <sup>-</sup> )                 | Fluorescent imaging of LPS induced HOCl production in living mice            |
|  | FO-PSe <sup>21</sup>  | --                                          | 350  | > 10-fold (1.0 equiv)  | > 10-fold (10 μM HOCl / 100 μM ONOO <sup>-</sup> )                  | Fluorescent imaging of HOCl in zebrafish and mice                            |

|                                            |                                                                   |                                                                                |                          |                                                            |                                          |                                                                                                                       |
|--------------------------------------------|-------------------------------------------------------------------|--------------------------------------------------------------------------------|--------------------------|------------------------------------------------------------|------------------------------------------|-----------------------------------------------------------------------------------------------------------------------|
|                                            | PFOBT <sub>36</sub> SeT<br>BT <sub>5</sub><br>Pdots <sup>22</sup> | Blue shift 42 nm                                                               | 500                      | 40-fold (ratio, I540/I680,<br>250 μM HOCl)                 | >6-fold (100 μM HOCl / 1 mM ·OH)         | Fluorescent imaging<br>of LPS-induced<br>HOCl generation in<br>peritonitis of living<br>mice                          |
| Cleavage of carbon-<br>carbon double bonds | 9-AEF <sup>23</sup>                                               | >3-fold decrease (100<br>μM probe / 500 μM<br>HOCl)                            | 300                      | 160-fold (1.0 equiv)                                       | >100-fold ·OH (100 μM HOCl /100<br>μM)   | --                                                                                                                    |
|                                            | hCy3-<br>csUCNP:Nd <sup>24</sup>                                  | >10-fold decrease<br>(probe 0.1 mg mL <sup>-1</sup> / 20<br>μM HOCl at 550 nm) | 500                      | >5-fold probe 0.1 mg<br>mL <sup>-1</sup> / 20 μM at 550 nm | >5-fold ·OH (20 μM HOCl /20 μM<br>·OH)   | Fluorescent imaging<br>of λ-carrageenan<br>induced HOCl<br>generation in mouse<br>model of arthritis                  |
| Deformylation reaction<br>(this work)      | FDOCl-1                                                           | 577-fold increase (10<br>μM probe / 25 μM<br>HOCl)                             | UV: 3.98 nM; FL: 2.62 nM | 2068-fold (2.5 equiv)                                      | 313-fold ·OH (25 μM HOCl /100 μM<br>·OH) | Fluorescent and<br>naked eye imaging<br>of λ-carrageenan<br>induced HOCl<br>generation in mouse<br>model of arthritis |

<sup>a</sup> If no actual data were provided in the references, data were estimated according to the original published figures.

<sup>b</sup> Reported detection limit provided in the references.

<sup>c</sup> Fluorescence intensity or emission ratio changes before and after treated with HOCl.

<sup>d</sup> Fluorescence intensity or emission ratio changes before and after treated with HOCl.

**Table S2** Crystal data and structure refinement details for **FDOCI-1** and **FDOCI-4**

|                                   | <b>FDOCI-1</b>                              | <b>FDOCI-4</b>                              |
|-----------------------------------|---------------------------------------------|---------------------------------------------|
| Identification code               | mo_51231ba                                  | mo_70223a                                   |
| Empirical formula                 | C17 H19 N3 O S                              | C19 H24 N4 O S                              |
| Formula weight                    | 313.41                                      | 356.48                                      |
| Temperature                       | 296(2) K                                    | 223(2) K                                    |
| Wavelength                        | 0.71073 Å                                   | 0.71073 Å                                   |
| Crystal system                    | Monoclinic                                  | Monoclinic                                  |
| Space group                       | P 21/c                                      | P2 <sub>1</sub> /n                          |
| Unit cell dimensions              | a = 16.166(4) Å                             | a = 5.9414(11) Å                            |
|                                   | b = 8.073(2) Å                              | b = 15.879(3) Å                             |
|                                   | c = 12.176(3) Å                             | c = 19.207(4) Å                             |
| Volume                            | 1566.1(7) Å <sup>3</sup>                    | 1807.4(6) Å <sup>3</sup>                    |
| Z                                 | 4                                           | 4                                           |
| Density (calculated)              | 1.329 Mg/m <sup>3</sup>                     | 1.310 Mg/m <sup>3</sup>                     |
| Absorption coefficient            | 0.212 mm <sup>-1</sup>                      | 0.194 mm <sup>-1</sup>                      |
| F(000)                            | 664                                         | 760                                         |
| Crystal size                      | 0.480 x 0.080 x 0.040 mm <sup>3</sup>       | 0.380 x 0.280 x 0.080 mm <sup>3</sup>       |
| Theta range for data collection   | 2.557 to 27.411°                            | 1.666 to 27.613°                            |
| Index ranges                      | -20 ≤ h ≤ 20, -10 ≤ k ≤ 8, -15 ≤ l ≤ 15     | -7 ≤ h ≤ 7, -20 ≤ k ≤ 20, -15 ≤ l ≤ 24      |
| Reflections collected             | 10950                                       | 13232                                       |
| Independent reflections           | 3538 [R(int) = 0.0440]                      | 4176 [R(int) = 0.0532]                      |
| Completeness to theta = 25.242°   | 99.4 %                                      | 99.5 %                                      |
| Absorption correction             | Semi-empirical from equivalents             | Semi-empirical from equivalents             |
| Max. and min. transmission        | 0.746 and 0.690                             | 0.956 and 0.860                             |
| Refinement method                 | Full-matrix least-squares on F <sup>2</sup> | Full-matrix least-squares on F <sup>2</sup> |
| Data / restraints / parameters    | 3538 / 0 / 203                              | 4176 / 0 / 233                              |
| Goodness-of-fit on F <sup>2</sup> | 1.005                                       | 1.010                                       |
| Final R indices [I > 2σ(I)]       | R1 = 0.0433, wR2 = 0.1016                   | R1 = 0.0461, wR2 = 0.0991                   |
| R indices (all data)              | R1 = 0.0836, wR2 = 0.1188                   | R1 = 0.0791, wR2 = 0.1139                   |
| Extinction coefficient            | n/a                                         | 0.0098(12)                                  |
| Largest diff. peak and hole       | 0.191 and -0.202 e.Å <sup>-3</sup>          | 0.257 and -0.236 e.Å <sup>-3</sup>          |
| Max. and min. transmission        | 0.746 and 0.690                             | --                                          |

**Table S3** Fluorescence responses of **FDOCI-1** (10  $\mu\text{M}$ ) toward different concentration of HOCl

| Concentration ( $\mu\text{M}$ ) | Fluorescence Intensity |
|---------------------------------|------------------------|
| 0                               | 17                     |
| 1                               | 1324                   |
| 5                               | 9759                   |
| 10                              | 22090                  |
| 25                              | 35150                  |

**Table S4** Fluorescence responses of **FDOCI-1** (10  $\mu\text{M}$ ) toward various ROS/RNS

|                        | Concentration ( $\mu\text{M}$ ) | Fluorescence Intensity |
|------------------------|---------------------------------|------------------------|
| $\text{H}_2\text{O}_2$ | 25                              | <35                    |
|                        | 50                              | <35                    |
|                        | 100                             | <35                    |
| $\text{O}_2^-$         | 25                              | <35                    |
|                        | 50                              | <35                    |
|                        | 100                             | <35                    |
| t-BuOOH                | 25                              | <35                    |
|                        | 50                              | <35                    |
|                        | 100                             | <35                    |
| $\cdot\text{OH}$       | 25                              | <35                    |
|                        | 50                              | 39.5                   |
|                        | 100                             | 112.3                  |
| NO                     | 25                              | <35                    |
|                        | 50                              | <35                    |
|                        | 100                             | <35                    |
| $\text{ONOO}^-$        | 25                              | <35                    |
|                        | 50                              | <35                    |
|                        | 100                             | <35                    |
| $\text{ROO}\cdot$      | 25                              | <35                    |
|                        | 50                              | <35                    |
|                        | 100                             | <35                    |
| t-BuOO $\cdot$         | 25                              | 37.25                  |
|                        | 50                              | 62.25                  |
|                        | 100                             | 103.5                  |

**Table S5** Absorbance changes of **FDOCI-1** (10  $\mu\text{M}$ ) toward different concentration of HOCl

| Concentration ( $\mu\text{M}$ ) | Absorbance |
|---------------------------------|------------|
| 0                               | 0.001      |
| 1                               | 0.118      |
| 5                               | 0.22       |
| 10                              | 0.322      |
| 25                              | 0.577      |
| 35                              | 0.696      |

**Table S6** Absorbance changes of **FDOCI-1** (10  $\mu\text{M}$ ) toward various ROS/RNS

|                        | Concentration ( $\mu\text{M}$ ) | Absorbance |
|------------------------|---------------------------------|------------|
| $\text{H}_2\text{O}_2$ | 25                              | <0.005     |
|                        | 50                              | <0.005     |
|                        | 100                             | <0.005     |
| $\text{O}_2^-$         | 25                              | <0.005     |
|                        | 50                              | <0.005     |
|                        | 100                             | <0.005     |
| t-BuOOH                | 25                              | <0.005     |
|                        | 50                              | <0.005     |
|                        | 100                             | <0.005     |
| $\cdot\text{OH}$       | 25                              | <0.005     |
|                        | 50                              | <0.005     |
|                        | 100                             | 0.013      |
| $\text{NO}\cdot$       | 25                              | <0.005     |
|                        | 50                              | <0.005     |
|                        | 100                             | <0.005     |
| $\text{ONOO}^-$        | 25                              | <0.005     |
|                        | 50                              | <0.005     |
|                        | 100                             | <0.005     |
| $\text{ROO}\cdot$      | 25                              | <0.005     |
|                        | 50                              | <0.005     |
|                        | 100                             | <0.005     |
| t-BuOO $\cdot$         | 25                              | <0.005     |
|                        | 50                              | 0.006      |
|                        | 100                             | 0.01       |

**Table S7** Other Photophysical Parameters of **FDOCI-1** before and after treated with HOCl<sup>a</sup>

|                                                              | $\epsilon^b$ (M <sup>-1</sup> cm <sup>-1</sup> ) | $\Phi^c$ | Brightness <sup>d</sup> (M <sup>-1</sup> cm <sup>-1</sup> ) |
|--------------------------------------------------------------|--------------------------------------------------|----------|-------------------------------------------------------------|
| <b>FDOCI-1</b> (10 $\mu$ M)                                  | 100                                              | -        | -                                                           |
| <b>FDOCI-1</b> (10 $\mu$ M) + HOCl (25 $\mu$ M) <sup>e</sup> | 57,700                                           | 0.02     | 1154                                                        |

<sup>a</sup> The data was recorded in sodium phosphate buffer (10 mM, pH 7.2, 0.1% EtOH)

<sup>b</sup> Molar absorption coefficient at 664 nm

<sup>c</sup>  $\Phi$ : absolute fluorescence quantum yield

<sup>d</sup> Brightness =  $\epsilon \times \Phi$ , at 664 nm<sup>25</sup>

<sup>e</sup> The data was recorded after 5 min

### 3. Additional images and figures

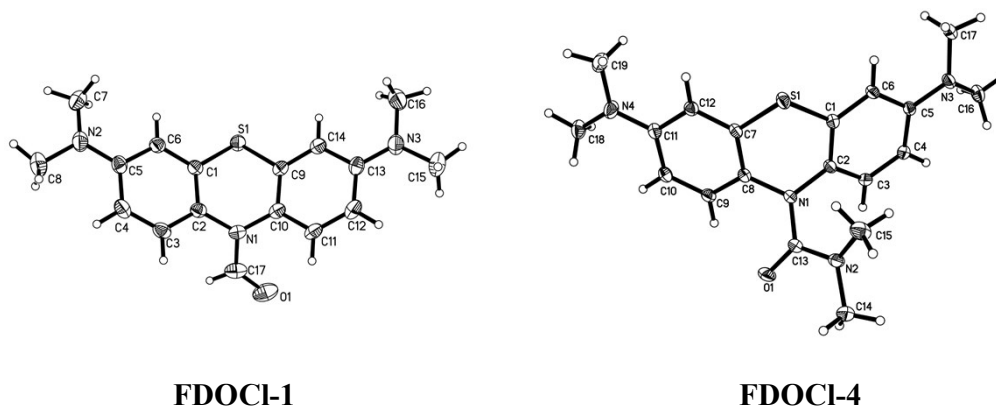

**Fig. S1** Crystal structure of **FDOCI-1** and **FDOCI-4**

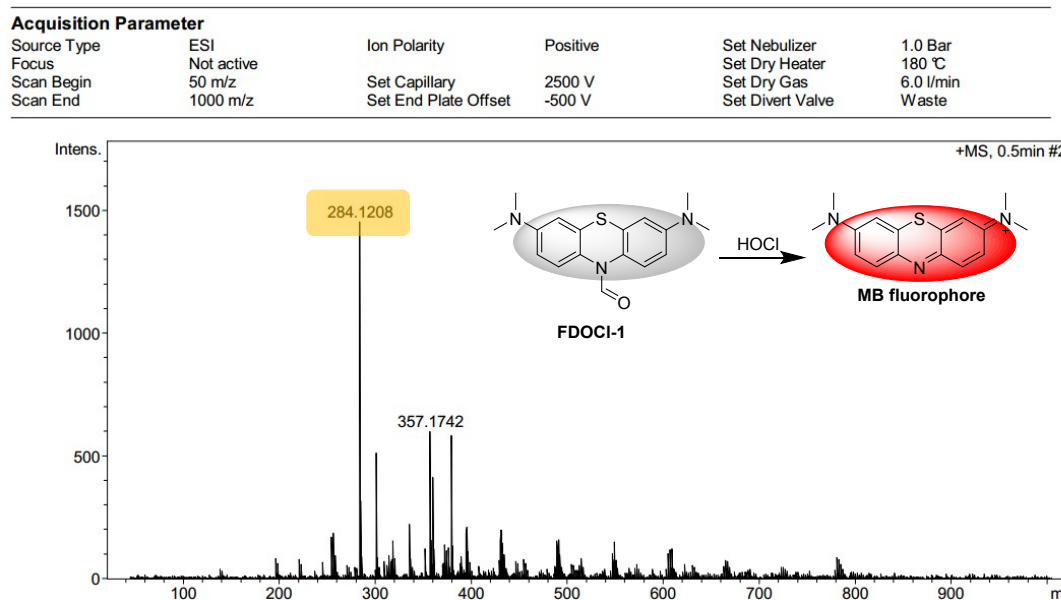

**Fig. S2** HRMS analysis of **FDOCI-1** after reacted with **HOCl**

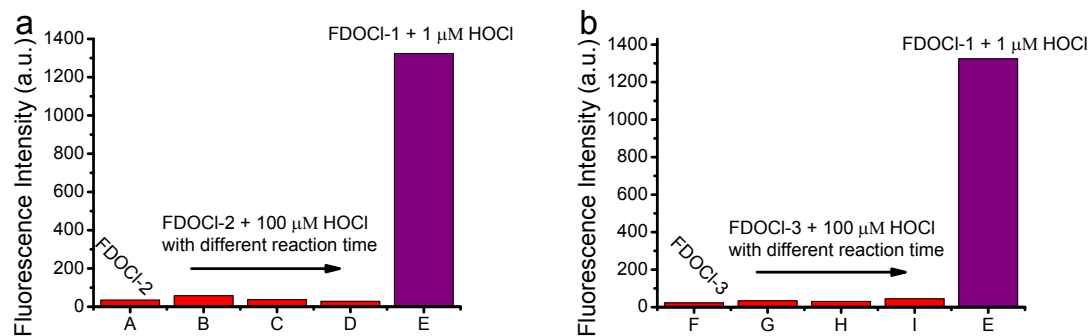

**Fig. S3** Fluorescence intensity change at 686 nm of (a) **FDOCI-2** and (b) **FDOCI-3** after adding 100 μM HOCl with different reaction time compared with **FDOCI-1** (A: **FDOCI-2** only; from B to D: **FDOCI-2** + 100 μM HOCl for 30 min, 60 min, 120 min; F: **FDOCI-3** only; from G to I: **FDOCI-3** + 100 μM HOCl for 30 min, 60 min, 120 min; E: **FDOCI-1** + 1 μM HOCl; probes using 10 μM; sodium phosphate buffer (PBS), 10 mM, pH 7.2, 0.1% EtOH;  $\lambda_{\text{ex}} = 620$  nm)

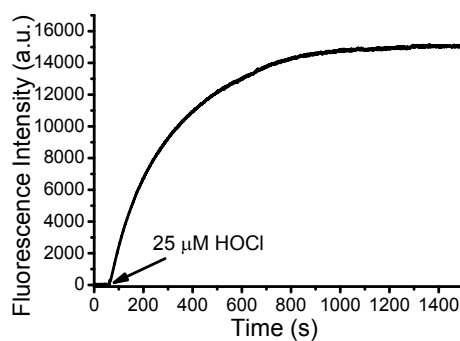

**Fig. S4** Fluorescence intensity changes at 684 nm of **FDOCI-4** (10 μM) after adding HOCl (25 μM) with different reaction time (PBS, 10 mM, pH 7.2, 0.1% EtOH;  $\lambda_{\text{ex}} = 620$  nm).



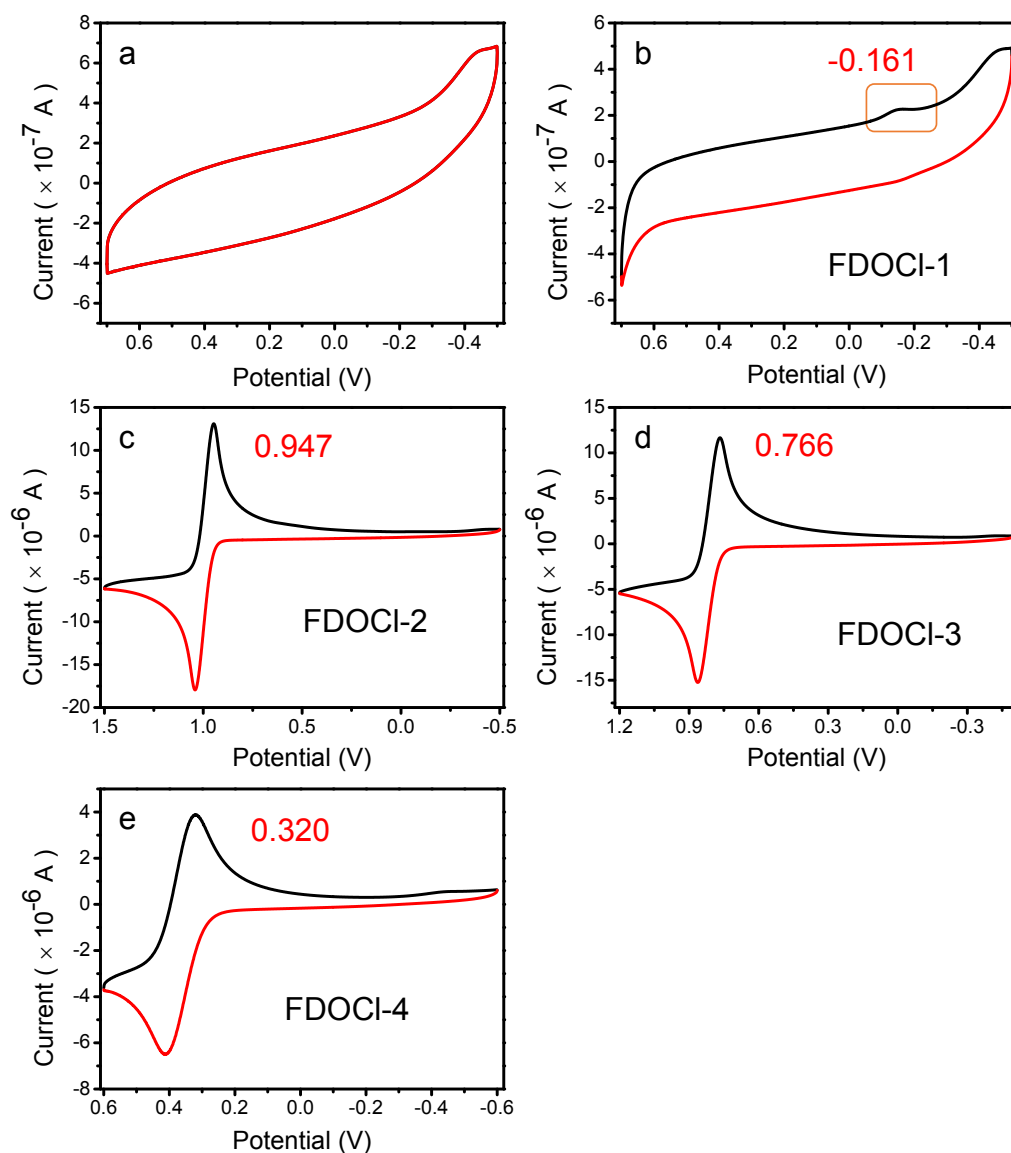

**Fig. S5** Cyclic voltammograms of (a) dichloromethane (DCM), (b) **FDOCI-1**, (c) **FDOCI-2**, (d) **FDOCI-3** and (e) **FDOCI-4** in DCM medium. (Electrolyte: 0.1 M TBAPF6. Scan rate = 0.05V/s; initial scanning direction: from positive potential to negative potential; concentration  $c = 1$  mM for each compounds)

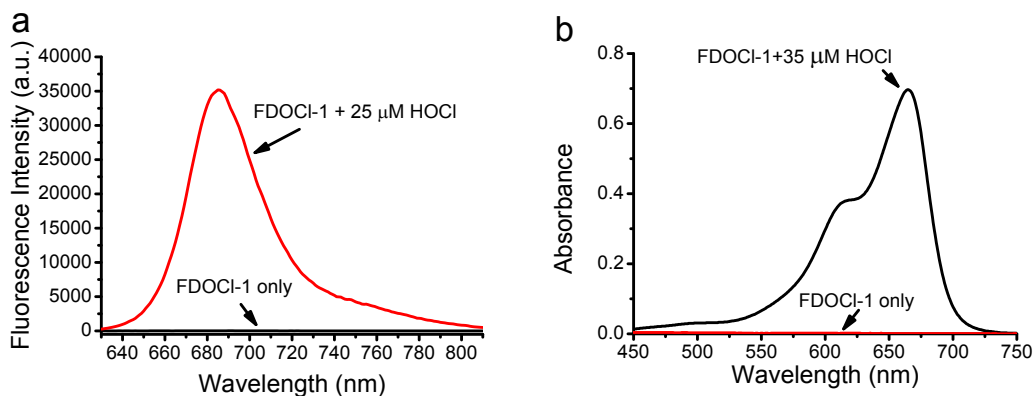

**Fig. S6** (a) Fluorescence spectra of **FDOCI-1** (10  $\mu\text{M}$ ) before/after adding 25  $\mu\text{M}$  HOCl with an excitation at 620 nm. (b) Absorption spectra of **FDOCI-1** (10  $\mu\text{M}$ ) before/after adding 35  $\mu\text{M}$  HOCl. (The data was recorded after 5 min in PBS (10 mM, pH 7.2, 0.1% EtOH);  $\lambda_{\text{ex}} = 620$  nm).

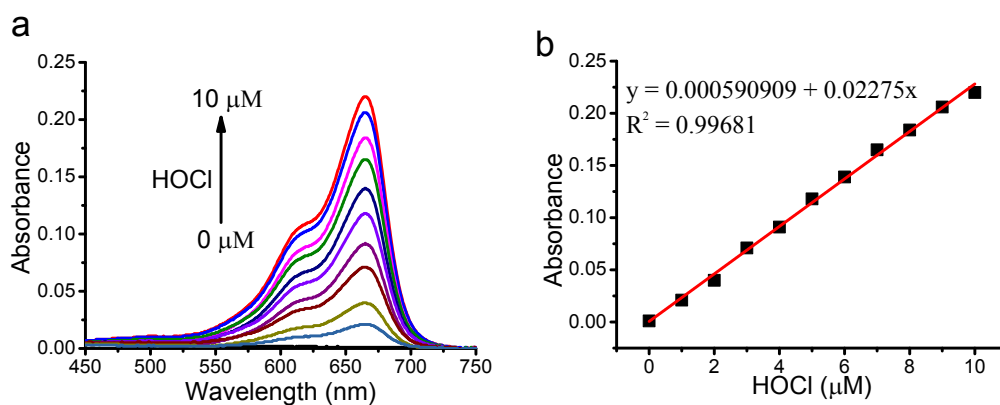

**Fig. S7** (a) Absorption spectra and (b) absorbance changes at 664 nm of **FDOCI-1** (10  $\mu\text{M}$ ) with increasing concentrations of HOCl. (The data was recorded after 5 min in PBS (10 mM, pH 7.2, 0.1% EtOH))

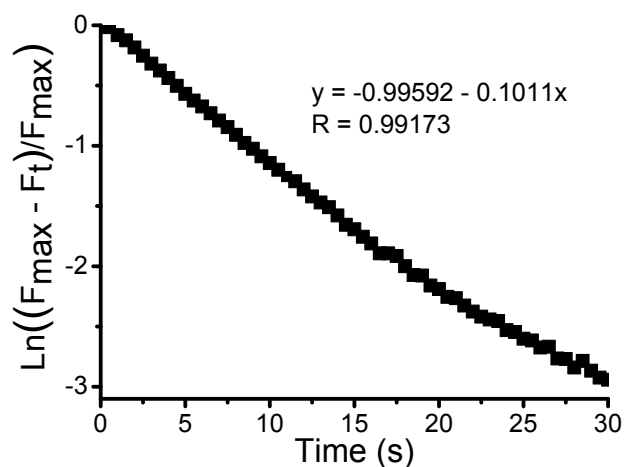

**Fig. S8** Pseudo-first-order kinetic plot of the reaction of 10  $\mu\text{M}$  **FDOCI-1** to 25  $\mu\text{M}$  HOCl (PBS, 10 mM, pH 7.2, 0.1% EtOH;  $\lambda_{\text{ex}} = 620$  nm). Slope = -0.1011.

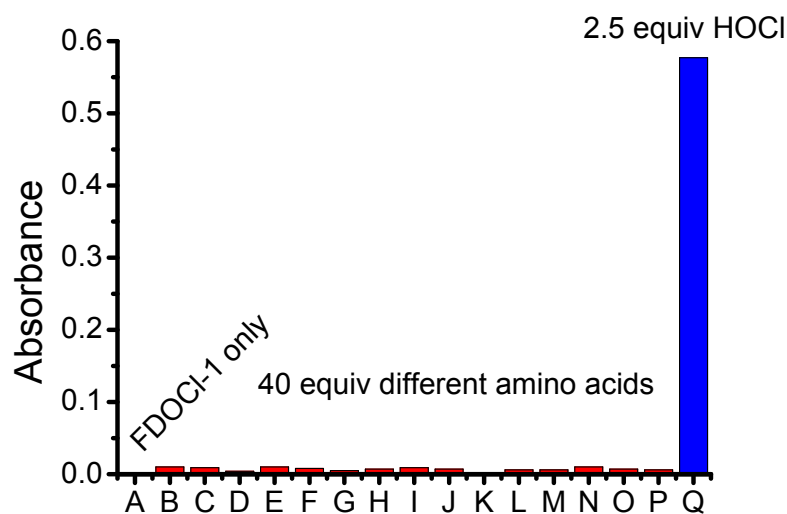

**Fig. S9** Absorbance at 664 nm of **FDOCl-1** (10  $\mu$ M) after adding various amino acids. From A to Q: Blank, Leu, Pro, Gly, Gln, Glu, Met, Lys, Trp, Ser, Thr, Asp, Ile, Val, His, Ala, HOCl. (The data was recorded after 5 min in PBS (10 mM, pH 7.2, 0.1% EtOH))

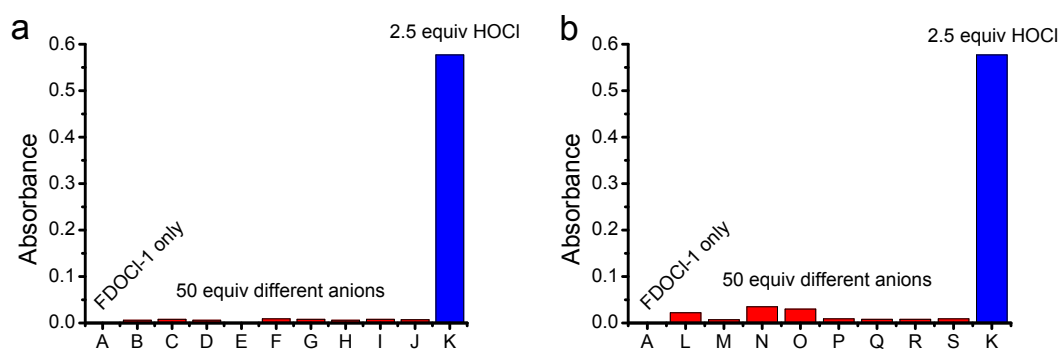

**Fig. S10** (a and b) Absorbance at 664 nm of **FDOCl-1** (10  $\mu$ M) after adding various anions/cations. From A to K: Blank,  $\text{CH}_3\text{COO}^-$ ,  $\text{CO}_3^{2-}$ ,  $\text{SO}_4^{2-}$ ,  $\text{Cl}^-$ ,  $\text{ClO}_4^-$ ,  $\text{F}^-$ ,  $\text{I}^-$ ,  $\text{NO}_2^-$ ,  $\text{S}_2\text{O}_3^{2-}$ , HOCl; from L to S:  $\text{Al}^{3+}$ ,  $\text{Ca}^{2+}$ ,  $\text{Cu}^{2+}$ ,  $\text{Fe}^{3+}$ ,  $\text{K}^+$ ,  $\text{Mg}^{2+}$ ,  $\text{NH}_4^+$ ,  $\text{Ni}^+$ . (The data was recorded after 5 min in PBS (10 mM, pH 7.2, 0.1% EtOH))

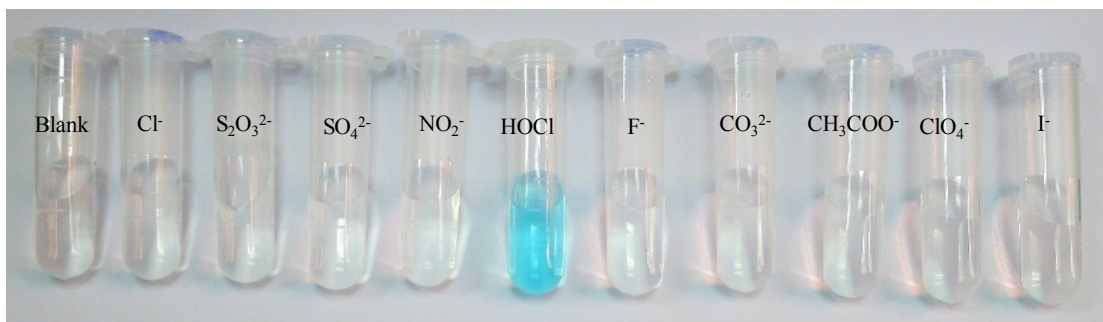

**Fig. S11** Colour changes of **FDOCI-1** (10 μM) after adding different anions. (PBS 10 mM, pH 7.2, 0.1% EtOH)

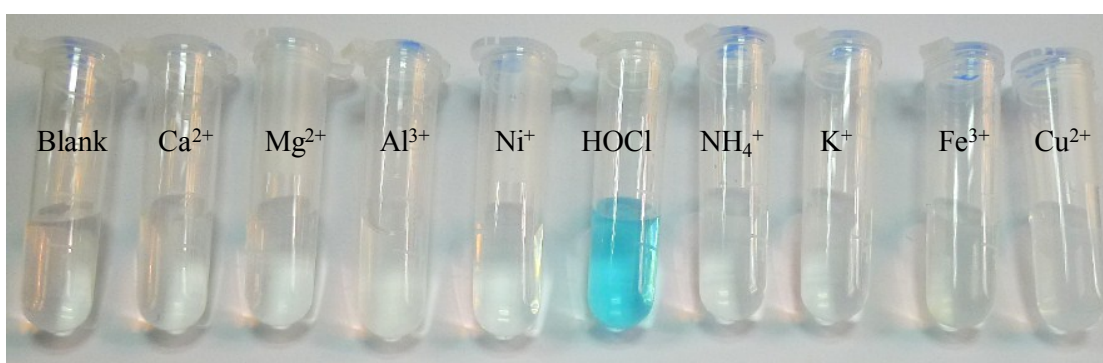

**Fig. S12** Colour changes of **FDOCI-1** (10 μM) after adding different cations. (PBS, 10 mM, pH 7.2, 0.1% EtOH)

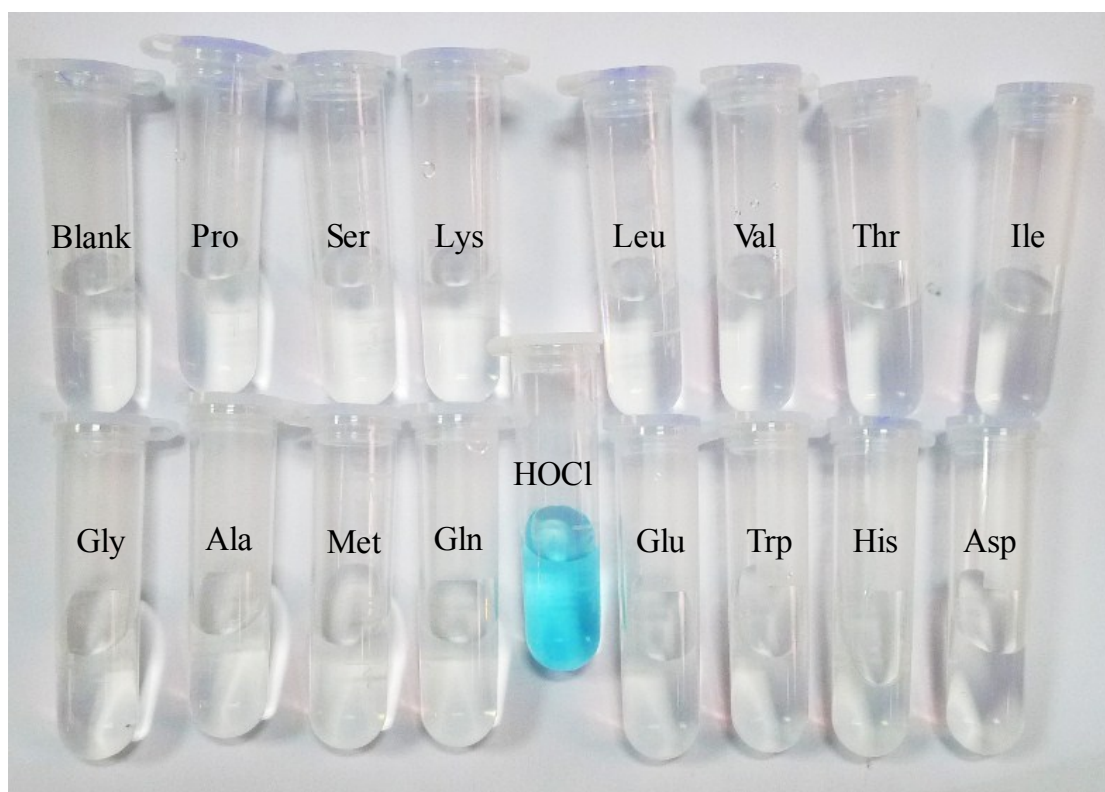

**Fig. S13** Colour changes of **FDOCI-1** (10  $\mu\text{M}$ ) after adding various amino acids. (PBS, 10 mM, pH 7.2, 0.1% EtOH)

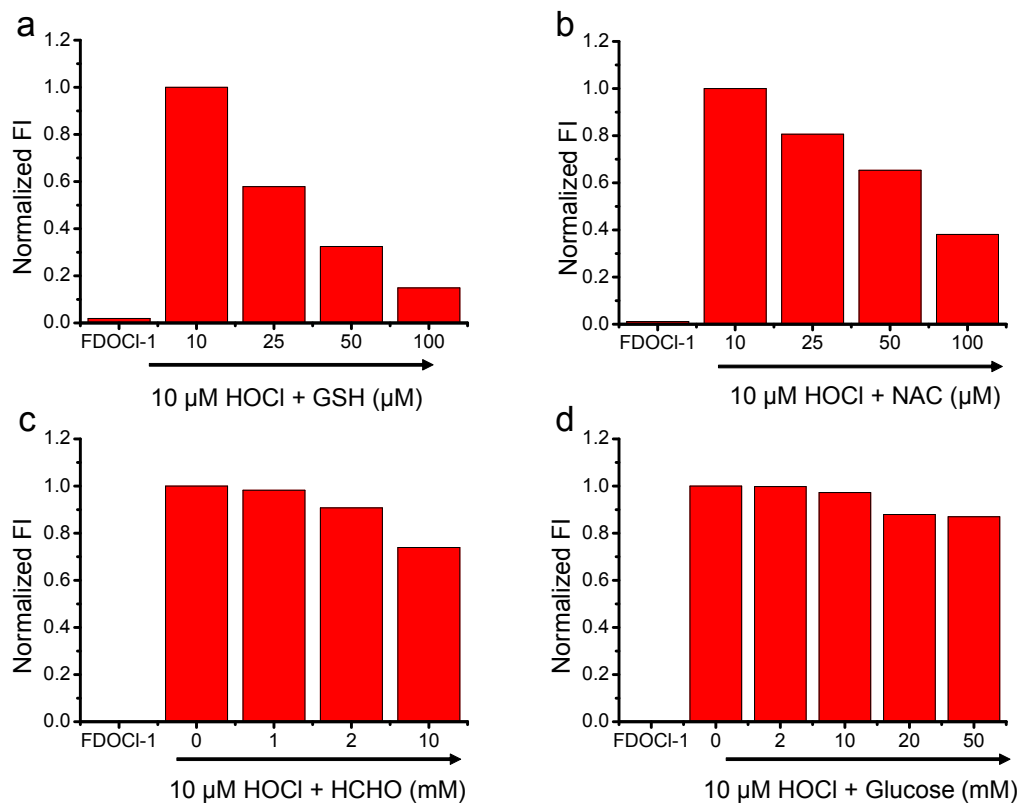

**Fig. S14** Fluorescence intensity of **FDOCI-1** (10  $\mu\text{M}$ ) at 686 nm toward **HOCl** (10  $\mu\text{M}$ ) in the present of sulfhydryl compounds (a) GSH; (B) NAC and aldehydes (c)

HCHO; (d) Glucose. (The data was recorded after 5 min in sodium phosphate buffer (10 mM, pH 7.2, 0.1% EtOH);  $\lambda_{\text{ex}} = 620 \text{ nm}$ )

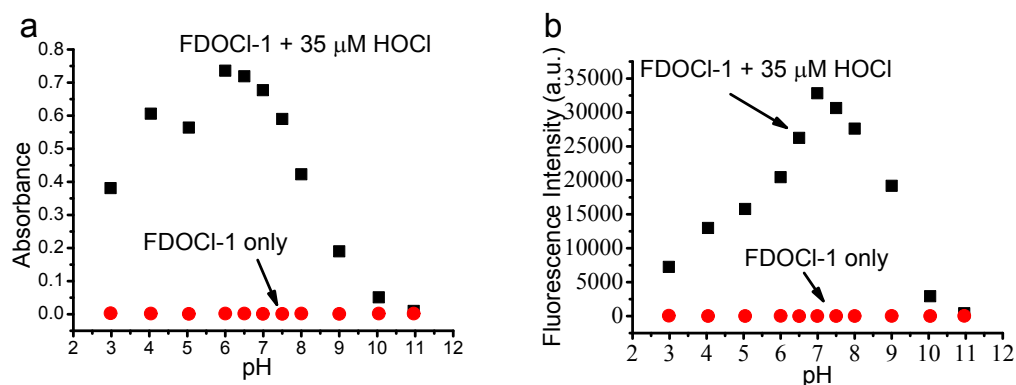

**Fig. S15** (a) Fluorescence intensity at 686 nm and (b) absorption strength at 664 nm of **FDOCI-1** (10  $\mu\text{M}$ ) changes with different pH before and after treated with 35  $\mu\text{M}$  HOCl. (The data was recorded after 5 min in PBS (10 mM, 0.1% EtOH);  $\lambda_{\text{ex}} = 620 \text{ nm}$ )

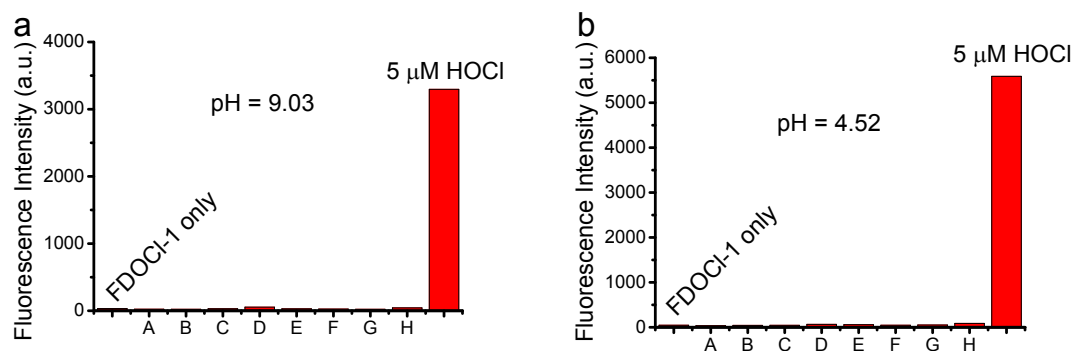

**Fig. S16** Fluorescence intensity of **FDOCI-1** (10  $\mu\text{M}$ ) at 686 nm after adding various ROS/RNS (50  $\mu\text{M}$ ) in the pH value of (a) 9.03 and (b) 4.52. From A to H:  $\text{H}_2\text{O}_2$ ,  $\text{O}_2^-$ , NO,  $\cdot\text{OH}$ ,  $\text{ONOO}^-$ ,  $\text{ROO}\cdot$ , t-BuOOH, t-BuOO $\cdot$ . (The data was recorded after 5 min in PBS (10 mM, 0.1% EtOH);  $\lambda_{\text{ex}} = 620 \text{ nm}$ )

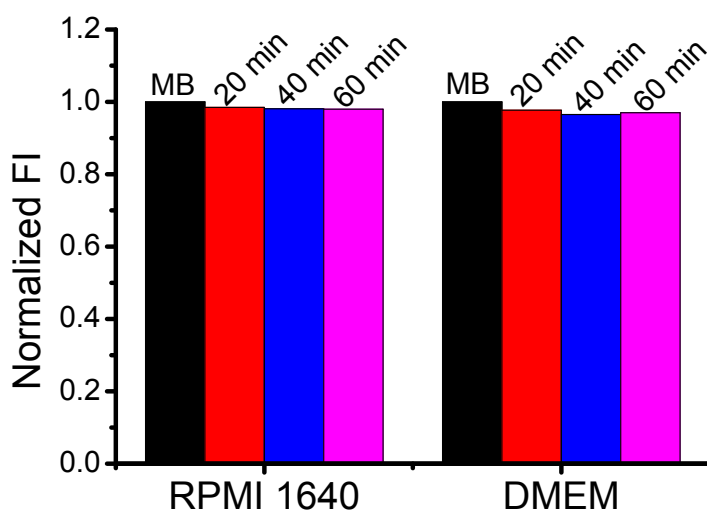

**Fig. S17** Fluorescence intensity changes at 686 nm of methylene blue (10  $\mu\text{M}$ ), before (black)/after adding 200  $\mu\text{M}$  HOCl for different time (red: 20 min; blue: 40 min; magenta: 60 min) in Dulbecco's modified essential medium (RPMI 1640) and Dulbecco's Modified Eagle's medium (DMEM). ( $\lambda_{\text{ex}} = 620 \text{ nm}$ )

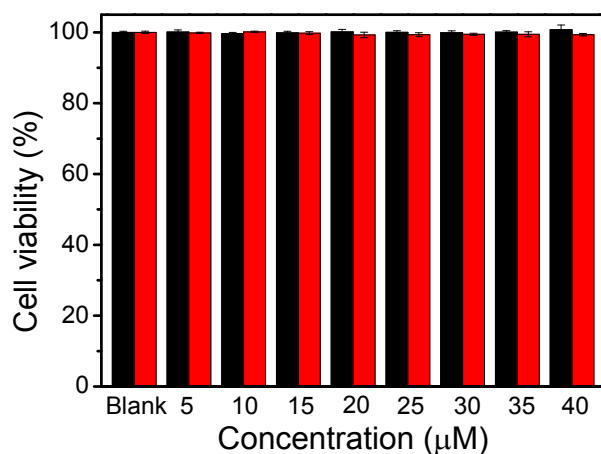

**Fig. S18** The cell viability of **FDOCI-1** at different concentration (0, 5, 10, 15, 20, 25, 30, 35, 40  $\mu\text{M}$ ) in RAW 264.7 macrophages cells for 6 h (black) and 12 h (red) measured by MTT assay.



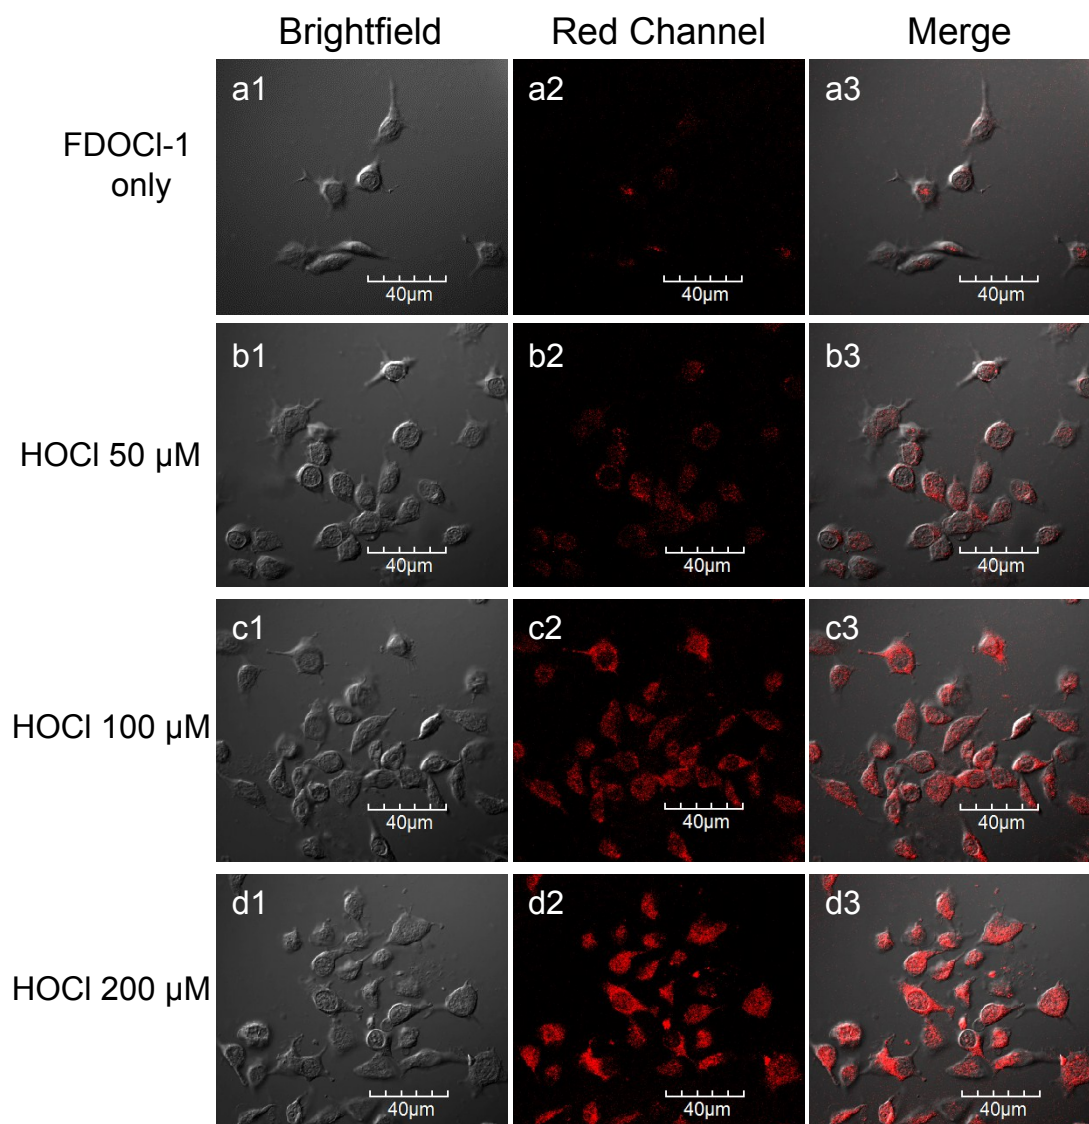

**Fig. S19** GLSM images of live RAW 264.7 macrophages. (a1, a2, a3) Cells were incubated with **FDOCI-1** (10 µM) for 60 min and washed by PBS buffer. Cells were preincubated with **FDOCI-1** (10 µM) for 60 min, washed by PBS buffer and incubated with HOCl (50 µM: b1, b2, b3; 100 µM: c1, c2, c3; 200 µM: d1, d2, d3) for 10 min. (CLSM imaging was performed on an Olympus FV1000 confocal scanning system with a 60×immersion objective lens. Red channel:  $700 \pm 50$  nm,  $\lambda_{\text{exc}} = 633$  nm)



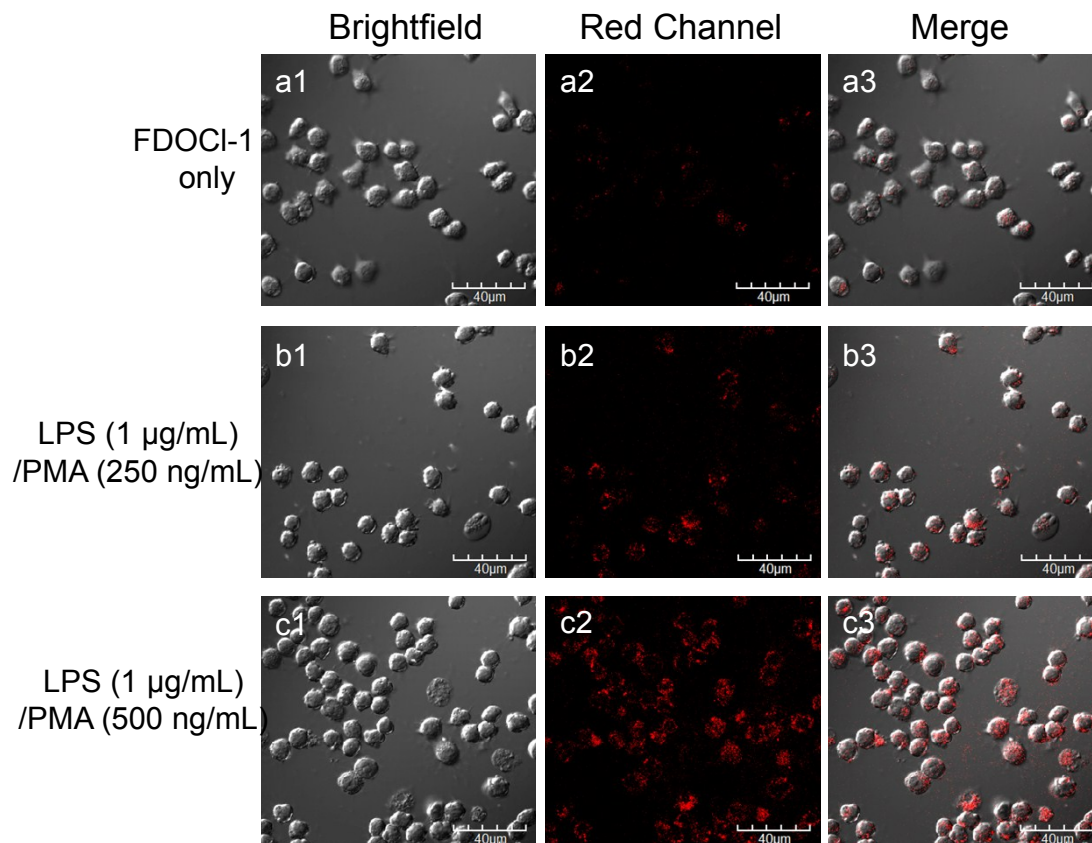

**Fig. S20** GLSM images of live RAW 264.7 macrophages. (a1, a2, a3) Cells were incubated with **FDOCI-1** (10 µM) for 60 min and washed by PBS buffer. Cells were preincubated with probes, washed by PBS buffer and stimulated with LPS (1 µg/mL)/PMA (250 ng/mL: b1, b2, b3; 500 ng/mL: c1, c2, c3 ) for 1 h. (CLSM imaging was performed on an Olympus FV1000 confocal scanning system with a 60×immersion objective lens. Red channel: 700 ± 50 nm,  $\lambda_{ex}$  = 633 nm)

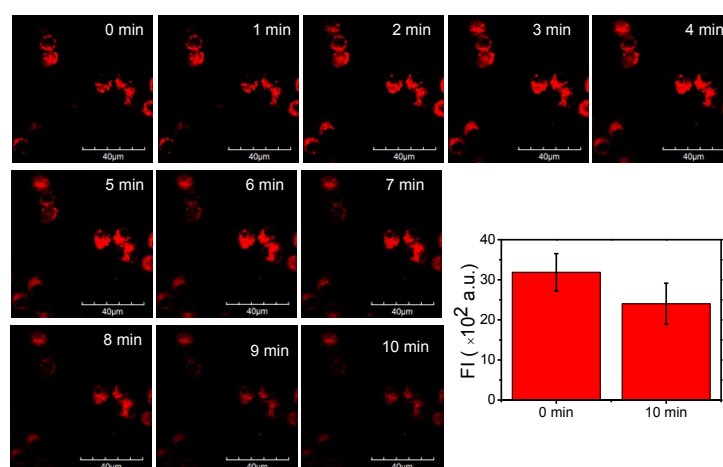

**Fig. S21** Photostability of MB in live cells. Fluorescence images were taken by time-sequential scanning of live RAW 264.7 macrophages preincubated with 5 µM MB for 30 min. (CLSM imaging was performed on an Olympus FV1000 confocal scanning

system with a 60×immersion objective lens. Red channel:  $700 \pm 50$  nm,  $\lambda_{ex} = 633$  nm)

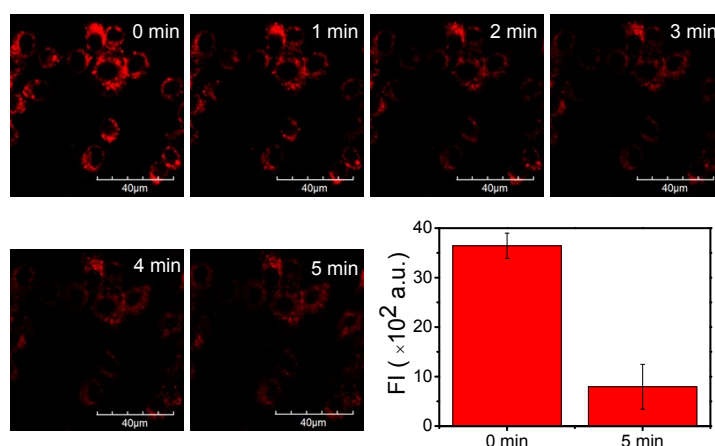

**Fig. S22** Photostability of Cy5 in live cells. Fluorescence images were taken by time-sequential scanning of live RAW 264.7 macrophages preincubated with  $5 \mu\text{M}$  Cy5 for 30 min. (CLSM imaging was performed on an Olympus FV1000 confocal scanning system with a 60×immersion objective lens. Red channel:  $700 \pm 50$  nm,  $\lambda_{ex} = 633$  nm)

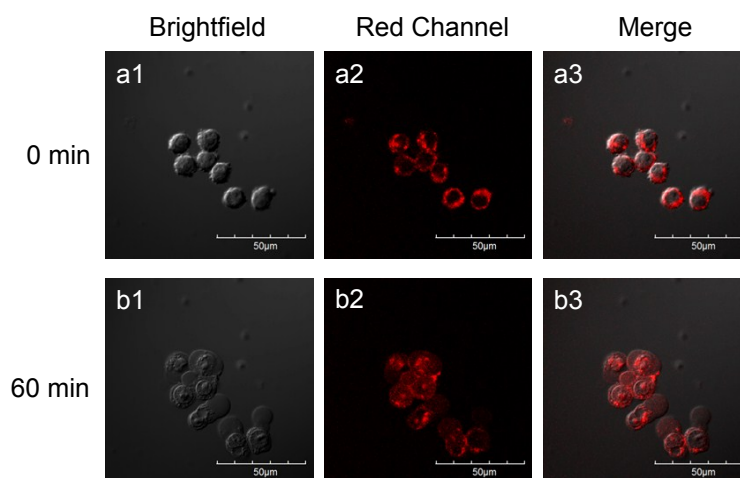

**Fig. S23** GLSM images of live RAW 264.7 macrophages preincubated with MB ( $10 \mu\text{M}$ ) for 30 min, washed by PBS buffer immediately (a1, a2, a3) and after 60 min (b1, b2, b3). (CLSM imaging was performed on an Olympus FV1000 confocal scanning system with a 60×immersion objective lens. Red channel:  $700 \pm 50$  nm,  $\lambda_{ex} = 633$  nm)

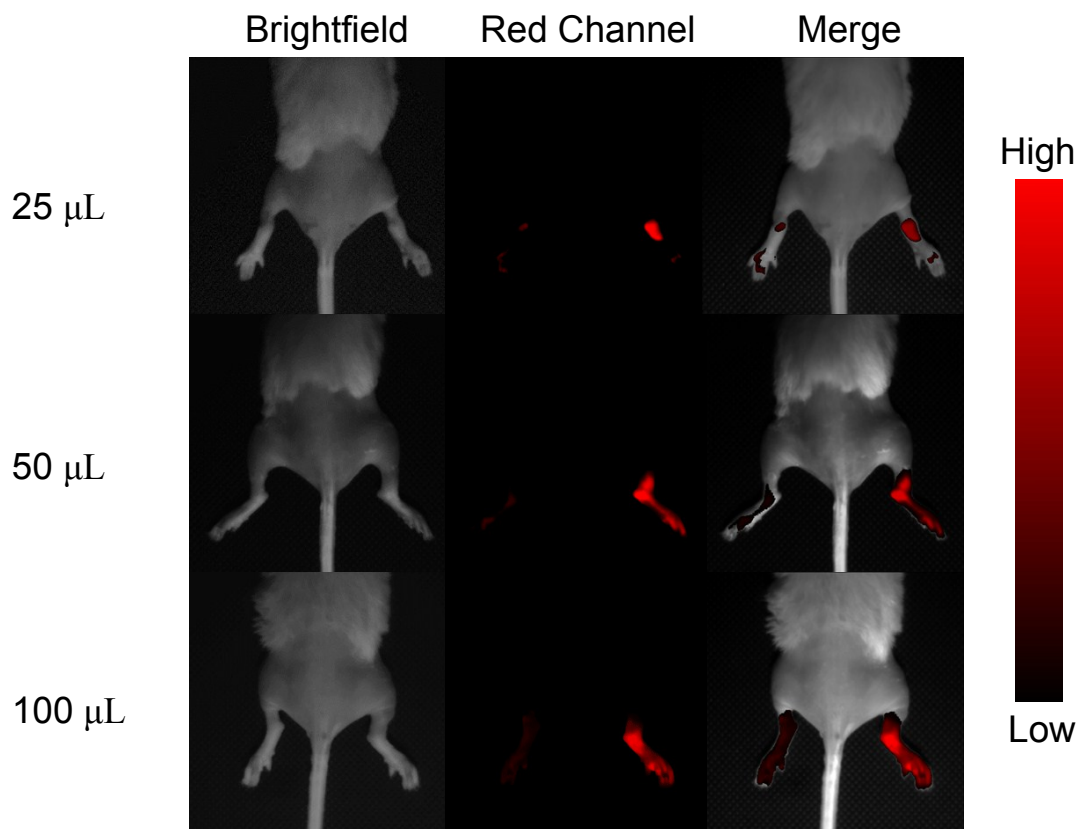

**Fig. S24** *In vivo* fluorescence imaging of the arthritis model.( arthritis model induced by injecting of different volume of  $\lambda$ -carrageenan, 5 mg/mL, in PBS into the right tibiotarsal ankles; the left tibiotarsal ankles as the control group without injection of  $\lambda$ -carrageenan; the fluorescence signal was collected at  $\lambda_{em} = 720 \pm 60$  nm under excitation with 635 nm CW laser, power density is  $0.3 \text{ mW cm}^{-2}$ ; **FDOCI-1**, 100  $\mu\text{L}$ , 1 mM)

## 4 NMR and HRMS spectra

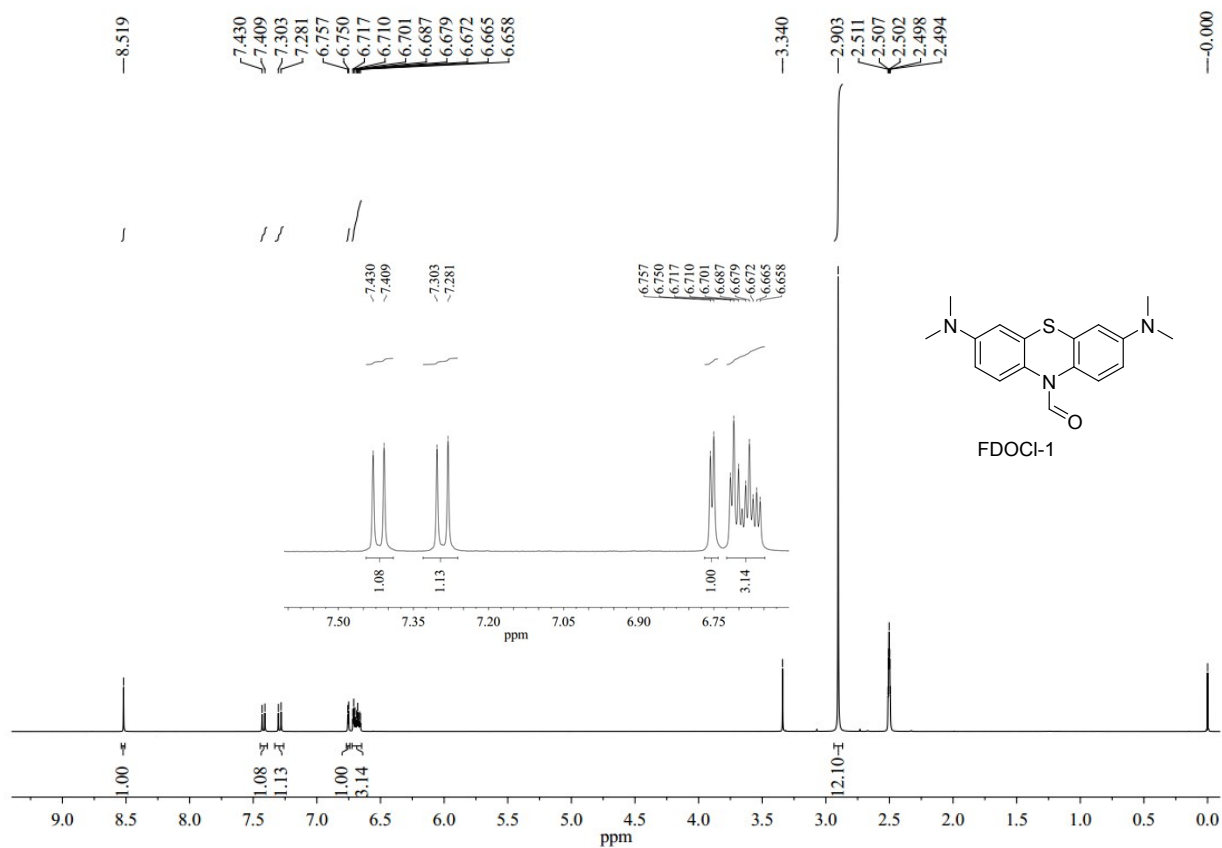

**Fig. S25**  $^1\text{H}$  NMR of FDOCI-1 in  $\text{DMSO-d}_6$

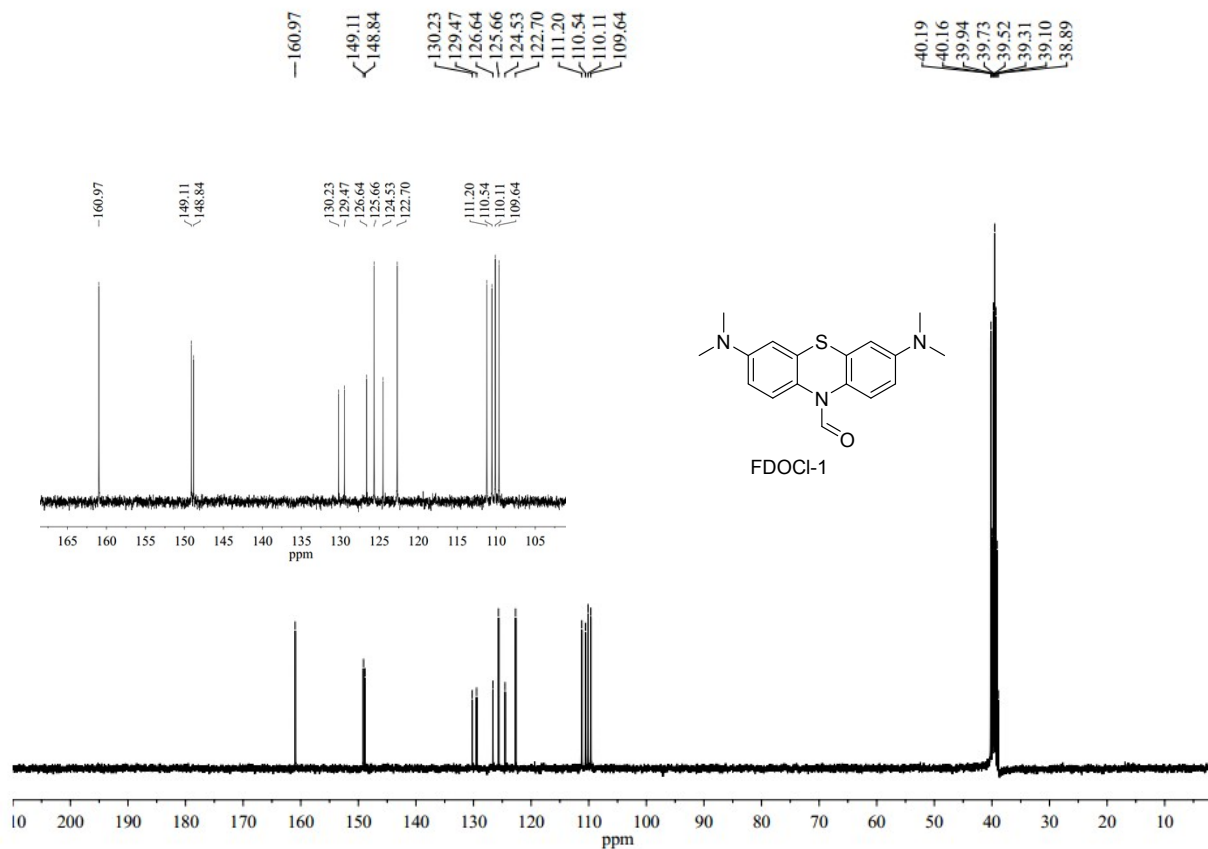

Fig. S26 <sup>13</sup>C NMR of FDOCI-1 in DMSO-d<sub>6</sub>

| Acquisition Parameter |            |                      |          |                  |           |
|-----------------------|------------|----------------------|----------|------------------|-----------|
| Source Type           | ESI        | Ion Polarity         | Positive | Set Nebulizer    | 1.0 Bar   |
| Focus                 | Not active |                      |          | Set Dry Heater   | 200 °C    |
| Scan Begin            | 50 m/z     | Set Capillary        | 4000 V   | Set Dry Gas      | 6.0 l/min |
| Scan End              | 1000 m/z   | Set End Plate Offset | -500 V   | Set Divert Valve | Waste     |

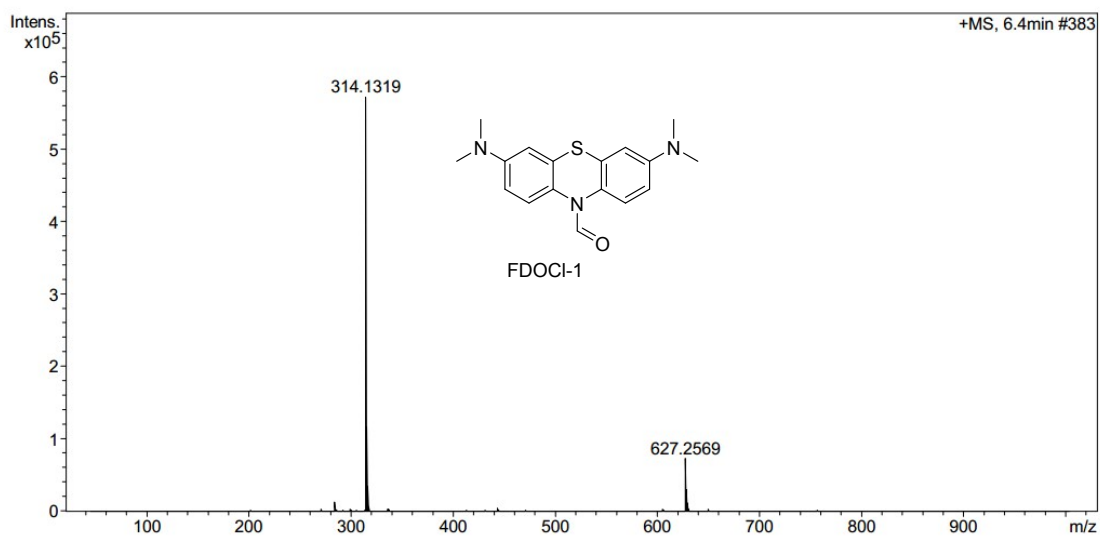

Fig. S27 HRMS of FDOCI-1

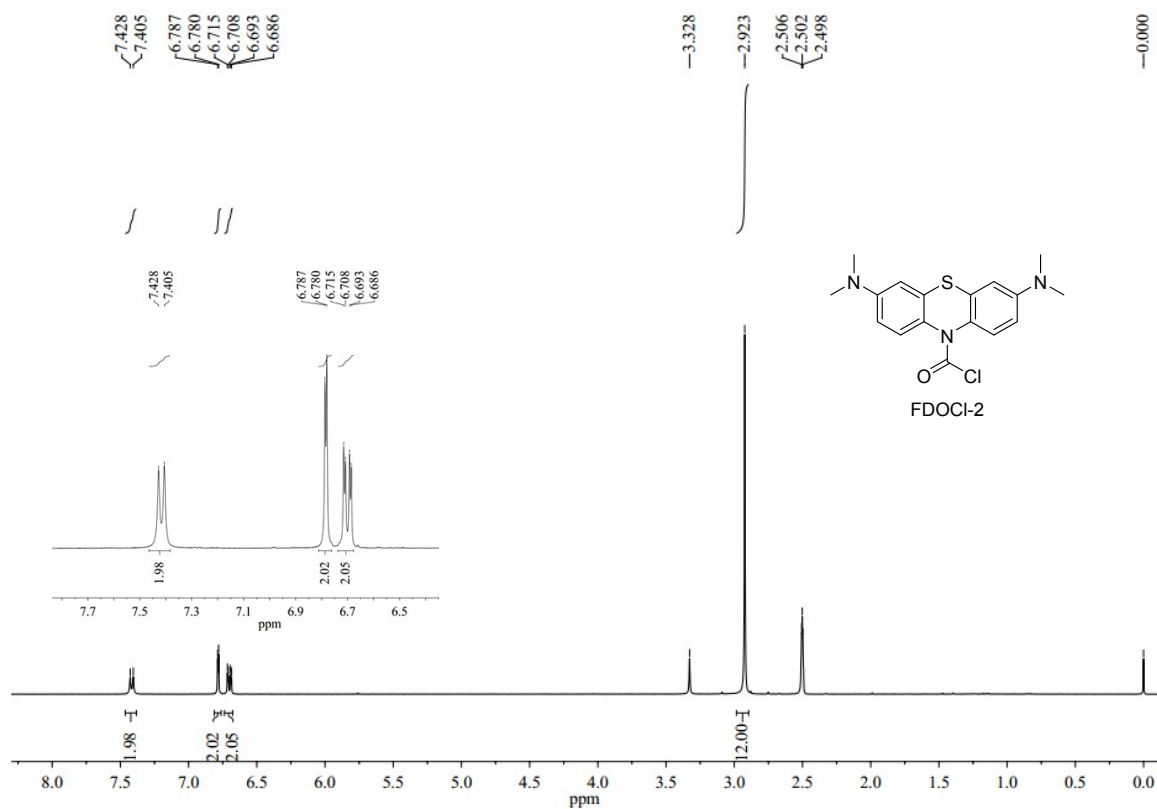

**Fig. S28** <sup>1</sup>H NMR of FDOCI-2 in DMSO-d<sub>6</sub>

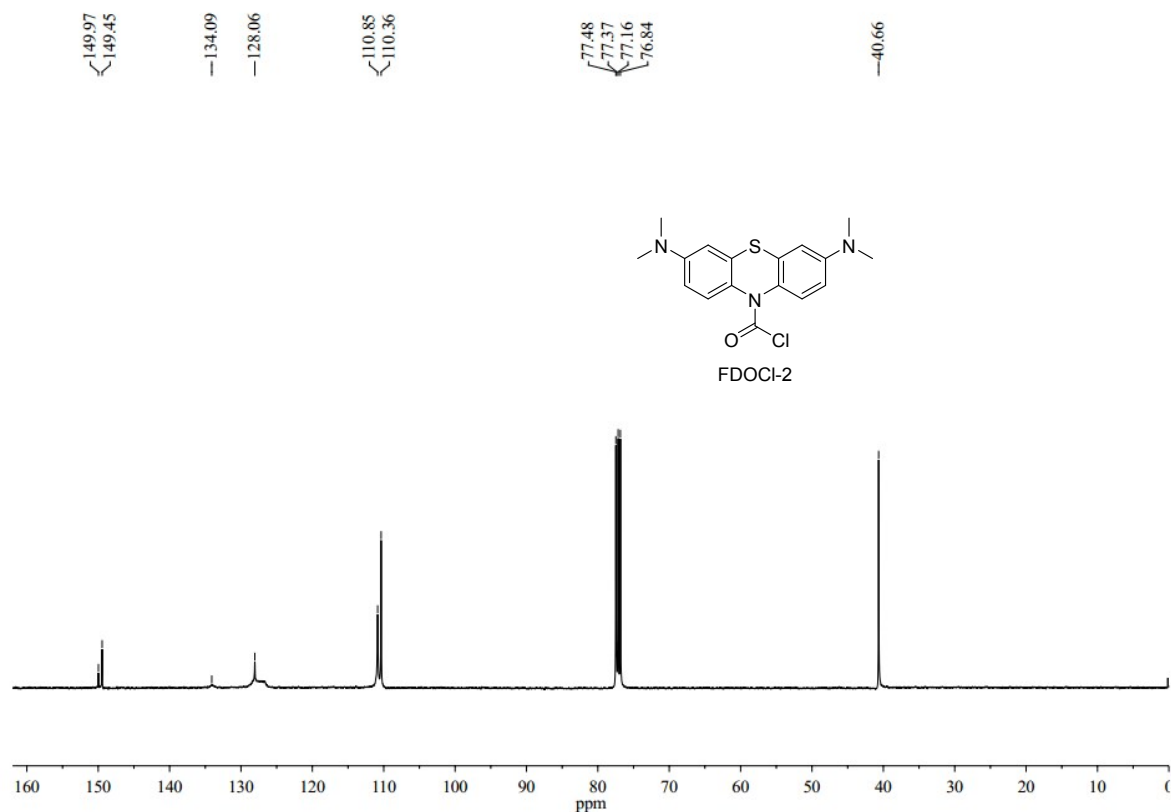

**Fig. S29** <sup>13</sup>C NMR of FDOCI-2 in CDCl<sub>3</sub>

**Acquisition Parameter**

|             |            |                      |          |                  |           |
|-------------|------------|----------------------|----------|------------------|-----------|
| Source Type | ESI        | Ion Polarity         | Positive | Set Nebulizer    | 1.0 Bar   |
| Focus       | Not active |                      |          | Set Dry Heater   | 200 °C    |
| Scan Begin  | 100 m/z    | Set Capillary        | 4000 V   | Set Dry Gas      | 6.0 l/min |
| Scan End    | 1500 m/z   | Set End Plate Offset | -500 V   | Set Divert Valve | Waste     |

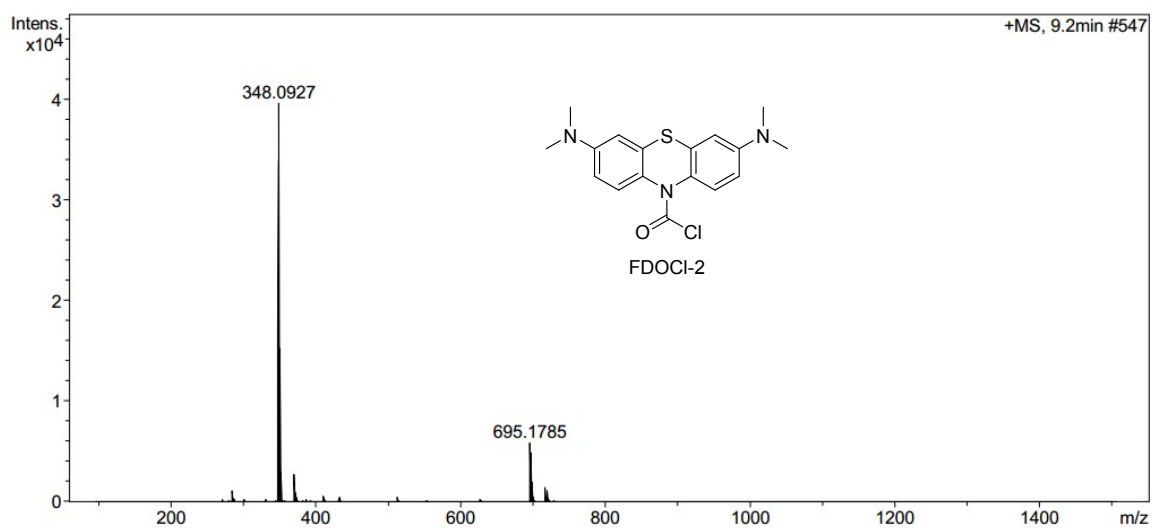**Fig. S30 HRMS of FDOCI-2**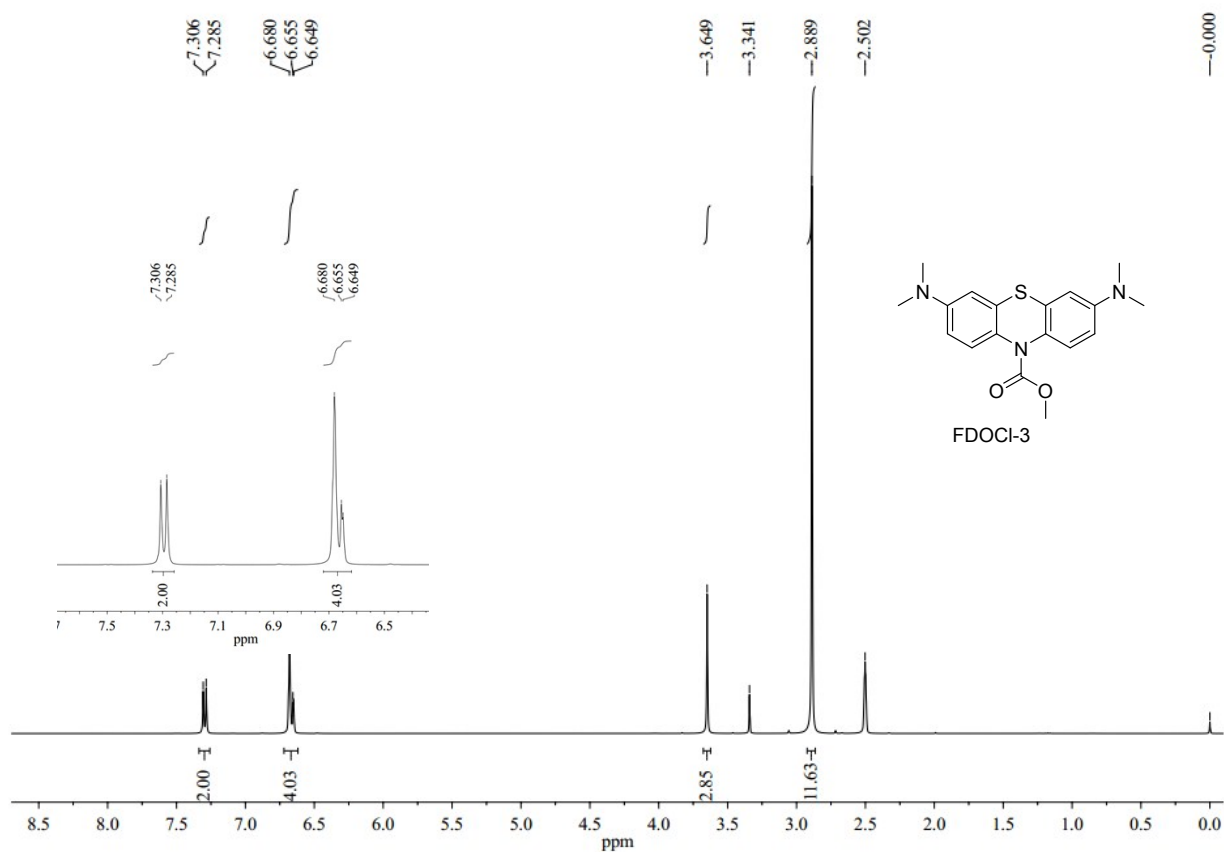**Fig. S31 <sup>1</sup>H NMR of FDOCI-3 in DMSO-d<sub>6</sub>**

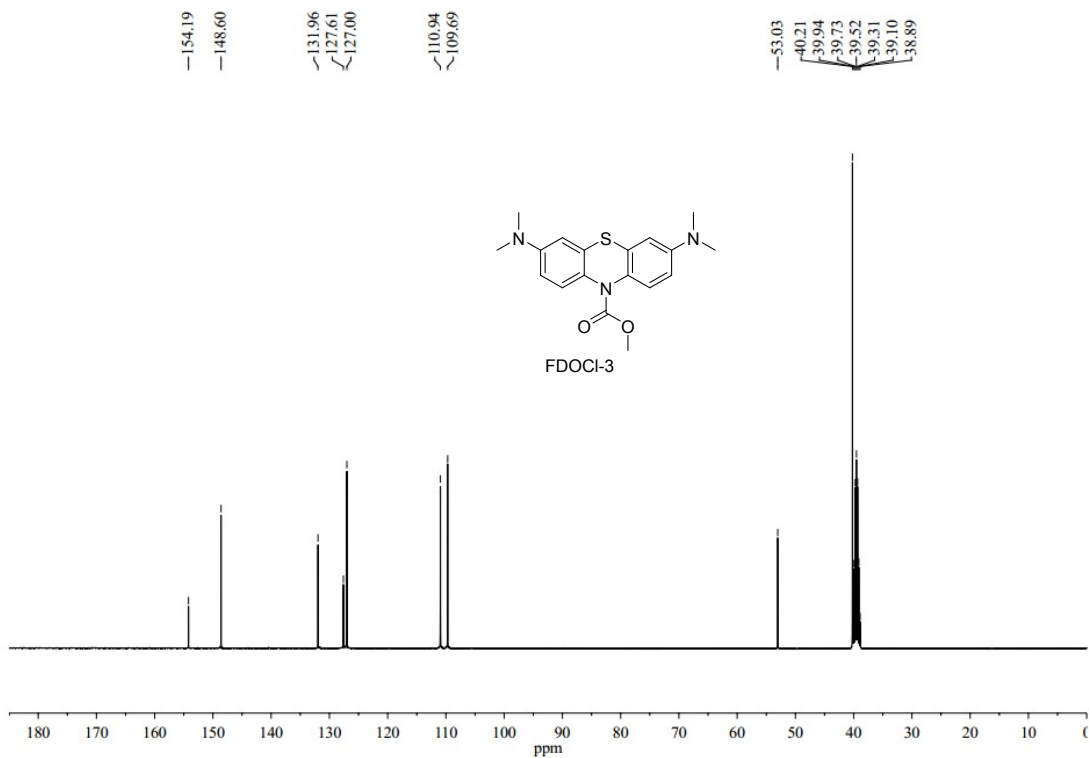

**Fig. S32**  $^{13}\text{C}$  NMR of **FDOCI-3** in  $\text{DMSO-d}_6$

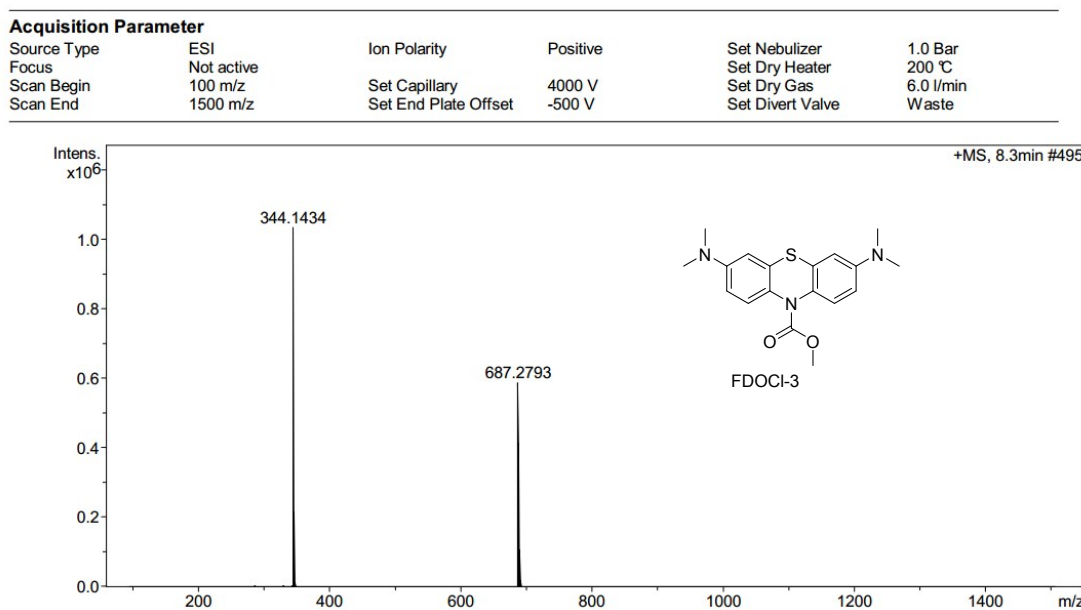

**Fig. S33** HRMS of **FDOCI-3**



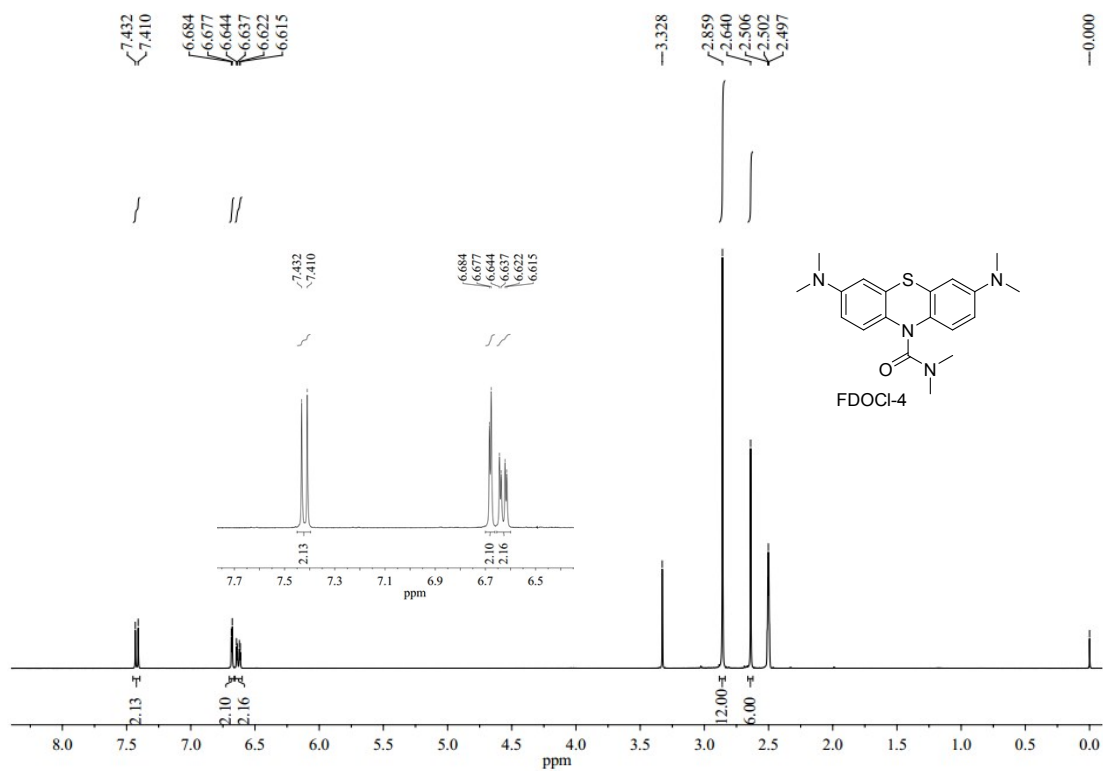

**Fig. S34**  $^1\text{H NMR}$  of FDOC1-4 in DMSO- $d_6$

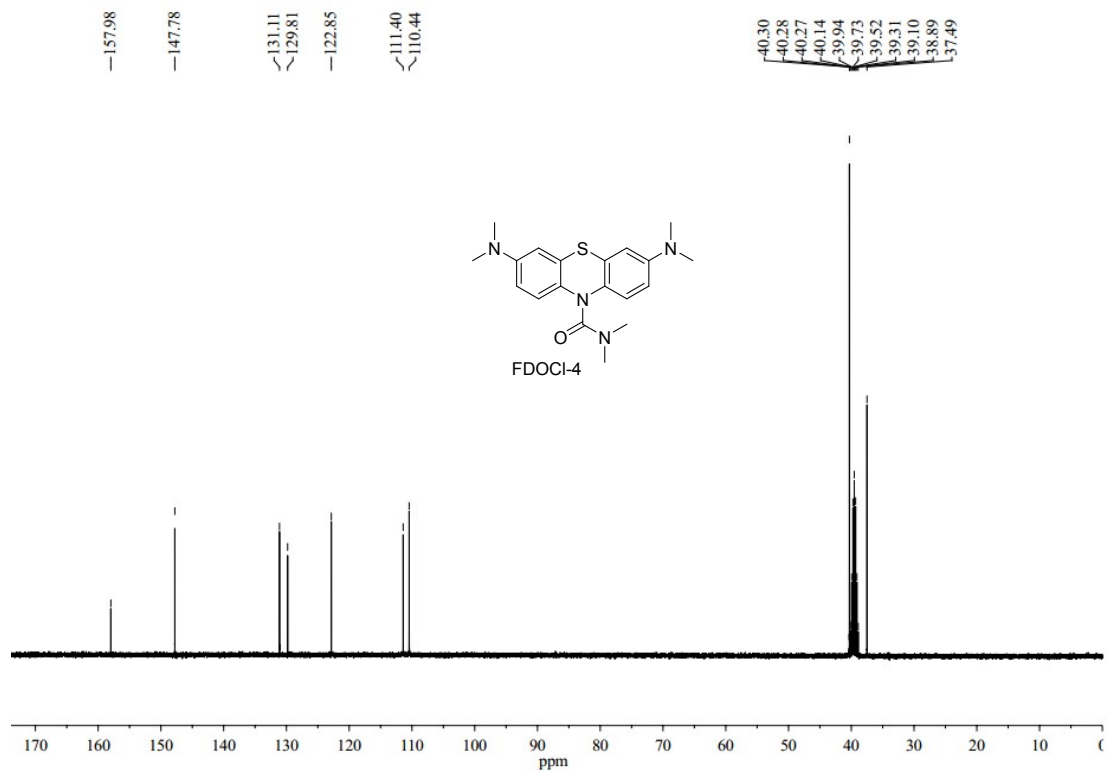

**Fig. S35**  $^{13}\text{C NMR}$  of FDOC1-4 in DMSO- $d_6$

**Acquisition Parameter**

|             |            |                      |          |                  |           |
|-------------|------------|----------------------|----------|------------------|-----------|
| Source Type | ESI        | Ion Polarity         | Positive | Set Nebulizer    | 1.0 Bar   |
| Focus       | Not active |                      |          | Set Dry Heater   | 200 °C    |
| Scan Begin  | 100 m/z    | Set Capillary        | 4000 V   | Set Dry Gas      | 6.0 l/min |
| Scan End    | 1500 m/z   | Set End Plate Offset | -500 V   | Set Divert Valve | Waste     |

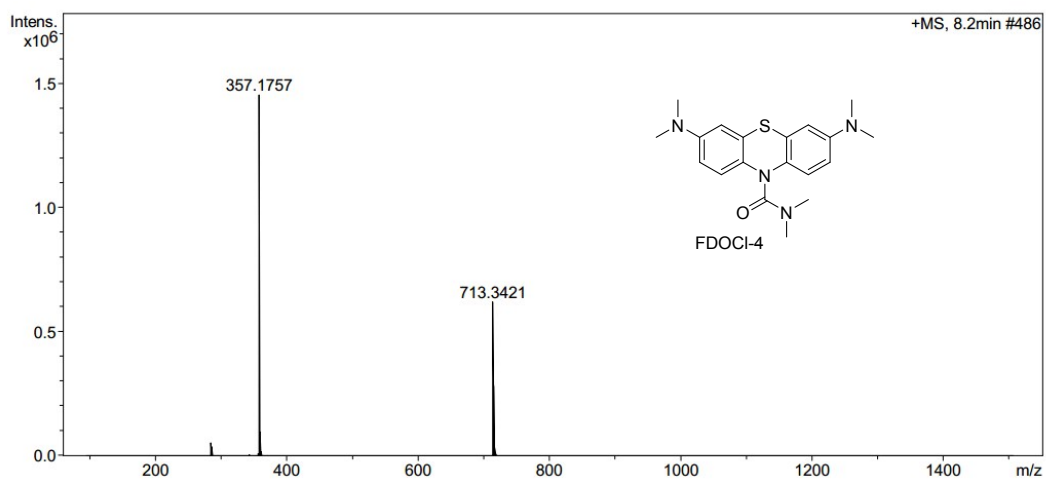**Fig. S36 HRMS of FDOCI-4**

## 5 References

- 1 Z.-N. Sun, F.-Q. Liu, Y. Chen, P. K. H. Tam and D. Yang, *Org. Lett.*, 2008, **10**, 2171-2174.
- 2 J. J. Hu, N.-K. Wong, Q. Gu, X. Bai, S. Ye and D. Yang, *Org. Lett.*, 2014, **16**, 3544-3547.
- 3 J. J. Hu, N.-K. Wong, M.-Y. Lu, X. Chen, S. Ye, A. Q. Zhao, P. Gao, R. Yi-Tsun Kao, J. Shen and D. Yang, *Chem. Sci.*, 2016, **7**, 2094-2099.
- 4 Y. Zhou, J.-Y. Li, K.-H. Chu, K. Liu, C. Yao and J.-Y. Li, *Chem. Commun.*, 2012, **48**, 4677-4679.
- 5 W. Lin, L. Long, B. Chen and W. Tan, *Chem. – Eur. J.*, 2009, **15**, 2305-2309.
- 6 X. Cheng, H. Jia, T. Long, J. Feng, J. Qin and Z. Li, *Chem. Commun.*, 2011, **47**, 11978-11980.
- 7 G. Wu, F. Zeng and S. Wu, *Anal. Methods.*, 2013, **5**, 5589-5596.
- 8 D. Li, Y. Feng, J. Lin, M. Chen, S. Wang, X. Wang, H. Sheng, Z. Shao, M. Zhu and X. Meng, *Sens. Actuators B: Chem.*, 2016, **222**, 483-491.
- 9 L. Yuan, W. Lin, Y. Xie, B. Chen and J. Song, *Chem. – Eur. J.*, 2012, **18**, 2700-2706.
- 10 L. Cao, R. Zhang, W. Zhang, Z. Du, C. Liu, Z. Ye, B. Song and J. Yuan, *Biomaterials*, 2015, **68**, 21-31.
- 11 X. Chen, K.-A. Lee, E.-M. Ha, K. M. Lee, Y. Y. Seo, H. K. Choi, H. N. Kim, M. J. Kim, C.-S. Cho, S. Y. Lee, W.-J. Lee and J. Yoon, *Chem. Commun.*, 2011, **47**, 4373-4375.
- 12 X. Chen, K.-A. Lee, X. Ren, J.-C. Ryu, G. Kim, J.-H. Ryu, W.-J. Lee and J. Yoon, *Nat. Protocols*, 2016, **11**, 1219-1228.
- 13 Q. Xu, K.-A. Lee, S. Lee, K. M. Lee, W.-J. Lee and J. Yoon, *J. Am. Chem. Soc.*, 2013, **135**, 9944-9949.
- 14 S. Kenmoku, Y. Urano, H. Kojima and T. Nagano, *J. Am. Chem. Soc.*, 2007, **129**, 7313-7318.
- 15 Y. Koide, Y. Urano, K. Hanaoka, T. Terai and T. Nagano, *J. Am. Chem. Soc.*, 2011, **133**, 5680-5682.
- 16 L. Yuan, L. Wang, B. K. Agrawalla, S.-J. Park, H. Zhu, B. Sivaraman, J. Peng, Q.-H. Xu and Y.-T. Chang, *J. Am. Chem. Soc.*, 2015, **137**, 5930-5938.
- 17 G. Li, D. Zhu, Q. Liu, L. Xue and H. Jiang, *Org. Lett.*, 2013, **15**, 2002-2005.
- 18 Q. Xu, C. H. Heo, G. Kim, H. W. Lee, H. M. Kim and J. Yoon, *Angew. Chem. Int. Ed.*, 2015, **54**, 4890-4894.
- 19 G. Cheng, J. Fan, W. Sun, J. Cao, C. Hu and X. Peng, *Chem. Commun.*, 2014, **50**, 1018-1020.
- 20 Z. Lou, P. Li, Q. Pan and K. Han, *Chem. Commun.*, 2013, **49**, 2445-2447.
- 21 W. Zhang, W. Liu, P. Li, J. kang, J. Wang, H. Wang and B. Tang, *Chem. Commun.*, 2015, **51**, 10150-10153.
- 22 L. Wu, I. C. Wu, C. C. DuFort, M. A. Carlson, X. Wu, L. Chen, C.-T. Kuo, Y. Qin, J. Yu, S. R. Hingorani and D. T. Chiu, *J. Am. Chem. Soc.*, 2017, **139**, 6911-6918.

- 23 S. Chen, J. Lu, C. Sun and H. Ma, *Analyst*, 2010, **135**, 577-582.
- 24 X. Zou, Y. Liu, X. Zhu, M. Chen, L. Yao, W. Feng and F. Li, *Nanoscale*, 2015, **7**, 4105-4113.
- 25 Y. Zhang, S. Swaminathan, S. Tang, J. Garcia-Amorós, M. Boulina, B. Captain, J. D. Baker and F. M. Raymo, *J. Am. Chem. Soc.*, 2015, **137**, 4709-4719.
